# Supplementary material for: Quadruply hydrogen-bonded heteroduplexes based on imide and urea units arrayed with ADDA/DAAD sequences
Source: Royal Society of Chemistry journal article supplement (doi:10.1039/c3ob40998h), 2013-01-01
Supplement: c3ob40998h.pdf [file c3ob40998h.pdf]

## Supporting Information

### Quadruply hydrogen-bonded heteroduplexes based on imide and urea units arrayed with ADDA/DAAD sequence

Xianghui Li,<sup>a</sup> Yiming Jia,<sup>b</sup> Yi Ren,<sup>a</sup> Youjia Wang,<sup>b</sup> Jinchuan Hu,<sup>b</sup> Teng Ma,<sup>a</sup> Wen Feng<sup>b</sup> and Lihua Yuan<sup>a\*</sup>

<sup>a</sup> College of Chemistry, Sichuan University, Chengdu 610064, China

<sup>b</sup> Key Laboratory for Radiation Physics and Technology of Ministry of Education, Institute of Nuclear Science and Technology, Sichuan University, Chengdu 610064, China

*lhuan@scu.edu.cn*

## Contents

|                                                                                                |           |
|------------------------------------------------------------------------------------------------|-----------|
| <b>1. General information .....</b>                                                            | <b>3</b>  |
| <b>2. <sup>1</sup>H NMR titration and UV/Vis titration procedure .....</b>                     | <b>3</b>  |
| 2.1 <sup>1</sup> H NMR titration procedure .....                                               | 3         |
| 2.2 UV/Vis titration procedure .....                                                           | 3         |
| <b>3. The method for calculating association constants. ....</b>                               | <b>4</b>  |
| <b>4. Self-assembly of duplexes.....</b>                                                       | <b>5</b>  |
| 4.1. Heteroduplex <b>1a 2a</b> .....                                                           | 5         |
| 4.2. Heteroduplex <b>1a 2b</b> .....                                                           | 6         |
| 4.3. Heteroduplex <b>1a 2d</b> .....                                                           | 7         |
| 4.4. Heteroduplex <b>1b 2a</b> .....                                                           | 8         |
| 4.5. Homoduplex <b>1a 1a</b> .....                                                             | 10        |
| 4.6. Homoduplex <b>1b 1b</b> .....                                                             | 10        |
| 4.7. Homoduplex <b>2a 2a</b> .....                                                             | 11        |
| 4.8. Homoduplex <b>2b 2b</b> .....                                                             | 11        |
| <b>5. Molecular modelling.....</b>                                                             | <b>12</b> |
| <b>6. <sup>1</sup>H NMR and <sup>13</sup>C NMR spectra of compounds 1a, 1b and 2a-2d .....</b> | <b>24</b> |
| <b>7. References.....</b>                                                                      | <b>30</b> |

## 1. General information

The  $^1\text{H}$  NMR and  $^{13}\text{C}$  NMR spectra were recorded on Bruker AVANCE AV II-400 MHz ( $^1\text{H}$ : 400 MHz;  $^{13}\text{C}$ : 100 MHz). UV/Vis spectra were measured by SHIMADZU UV-2450.  $\text{CDCl}_3$ , acetone- $d_6$  and  $\text{DMSO-}d_6$  were purchased from Cambridge Isotope Laboratories, used for the titration experiments without further drying.  $\text{CH}_2\text{Cl}_2$  used for UV/Vis titration experiment is HPLC grade.  $^1\text{H}$  NMR and UV/Vis titration experiments of heterodimer were carried out twice or three times. Dilution experiments of homodimer were carried out twice. The association constants were reported as the averaged values and the errors were the standard deviation.

## 2. $^1\text{H}$ NMR titration and UV/Vis titration procedure

### 2.1 $^1\text{H}$ NMR titration procedure

The titration procedure is exemplified with **1a** and **2a** as follows:

A stock solution of **2a** as the host (2 mM) was prepared (**Solution A**). The other stock solution containing the host **2a** (2 mM) and the guest **1a** (4 mM) was also prepared (**Solution B**). An aliquot of **Solution A** ( $X \mu\text{L}$ ) was mixed with an aliquot of **Solution B** ( $Y \mu\text{L}$ ) in NMR tube ( $X = 500, 450, \dots, 50, 0$ ;  $Y = 0, 50, \dots, 450, 500$ ). This provided eleven samples for NMR determination in which the host concentration was maintained constant. Each titration experiment was performed three times. The titration experiment for **9 2d** was repeated twice.

### 2.2 UV/Vis titration procedure

A stock solution of **1b** as the host (40  $\mu\text{M}$ ) was prepared (**Solution A**). The other stock solution containing host **1b** (40  $\mu\text{M}$ ) and the guest **2a** (800  $\mu\text{M}$ ) was also prepared (**Solution B**). To a 1 cm quartz glass cuvette was added **Solution A** (3.0 mL) and the UV/Vis spectrum was recorded. Aliquots of **Solution B** were then added to the cuvette, maintaining the concentration of **1b** constant at 40  $\mu\text{M}$ . After each addition, the spectrum of the resulting solution was recorded. Three

titration experiments were performed and the results were used for  $K_a$  calculation.

### 3. The method for calculating association constants.<sup>1</sup>

All binding data were analysed by solving the Equations (1)-(3) for NMR titration experiments or solving Equation (4) for UV/Vis titration experiments based nonlinear regression analysis:

$$\text{H} + \text{G} \xrightleftharpoons{K_a} \text{HG}$$
$$[\text{HG}] = \frac{(1/K_a + [\text{G}]_0 + [\text{H}]_0) - \sqrt{(1/K_a + [\text{G}]_0 + [\text{H}]_0)^2 - 4[\text{G}]_0[\text{H}]_0}}{2} \quad (1)$$

$$[\text{H}] = [\text{H}]_0 - [\text{HG}] \quad (2)$$

$$\delta_{\text{obs}} = \frac{[\text{HG}]}{[\text{H}]_0} \delta_b + \frac{[\text{H}]}{[\text{H}]_0} \delta_f \quad (3)$$

[HG] is the concentration of complex.

[G]<sub>0</sub> is the concentration of guest.

[H]<sub>0</sub> is the concentration of host.

$K_a$  is the dimerization constant.

$\delta_f$  is the free chemical shift of host.

$\delta_b$  is the limiting bound chemical shift of host.

$\delta_{\text{obs}}$  is the observable chemical shift of host.

$$\Delta A = \frac{1}{2} \{ (\Delta \varepsilon ([\text{H}]_0 + [\text{G}]_0 + 1/K_a) - \sqrt{\Delta \varepsilon^2 ([\text{H}]_0 + [\text{G}]_0 + 1/K_a)^2 - 4\Delta \varepsilon [\text{H}]_0 [\text{G}]_0}) + \varepsilon_G [\text{G}] \} \quad (4)$$

[HG] is the concentration of complex.

[G]<sub>0</sub> is the concentration of guest.

[H]<sub>0</sub> is the concentration of host.

$K_a$  is the association constant.

$\Delta \varepsilon$  is the change of molar absorption coefficient

$\varepsilon_G$  is the molar absorption coefficient of guest

$\Delta A$  is the change of absorption.

## 4. Self-assembly of duplexes

### 4.1. Heteroduplex **1a** **2a**

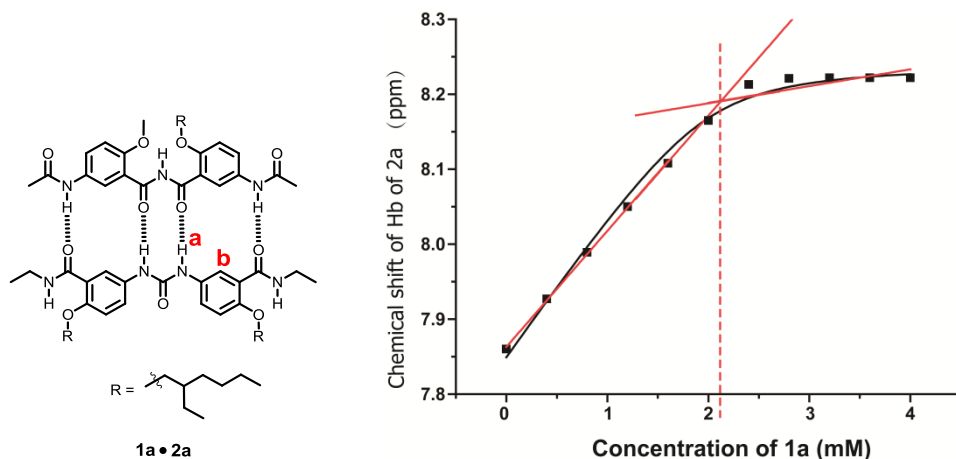

$$K_a = (1.6 \pm 0.5) \times 10^4 \text{ M}^{-1}$$

**Figure S1.** Determination of the binding constant of **1a** **2a** in  $\text{CDCl}_3$  at 298 K. Fitting result based on C-H<sub>b</sub>.  $K_a$  is the average value calculated from triplicate measurements, and error is the standard deviation.

The equilibria in the dimeric process include **1a** **1a**, **2a** **2a** and **1a** **2a**. The  $K_{\text{dim}}$  values of **1a** **1a** and **2a** **2a** were obtained by NMR dilution experiments and fixed in the fitting process using ChemEqui 7.23. Chemical shift of **2a** is plotted against number of experimental points corresponding to concentration of **1a**.

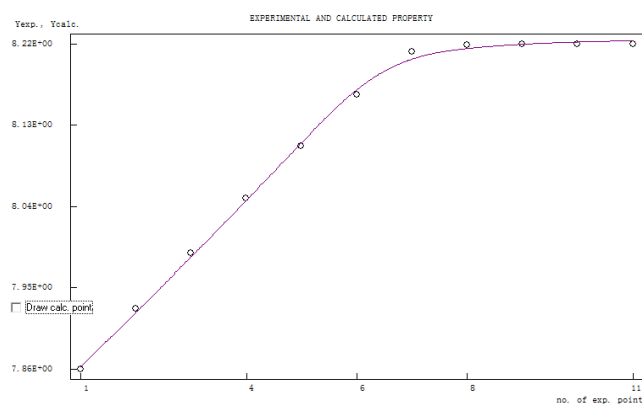

$$K_a = (8.7 \pm 0.8) \times 10^4 \text{ M}^{-1}$$

**Figure S2.** Determination of  $K_a$  value of **1a** **2a** incorporating additional homodimeric equilibria in  $\text{CDCl}_3$  at 298 K. Fitting result based on C-H<sub>b</sub>.  $K_a$  is the average value calculated from triplicate

measurements, and error is the standard deviation.

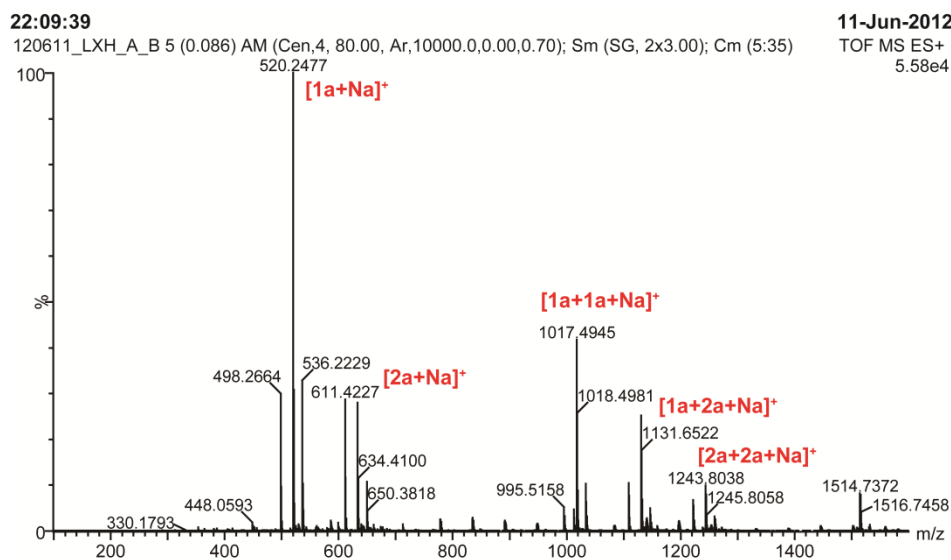

Figure S3. ESI-MS spectrum of **1a** and **2a** (1:1) in CH<sub>3</sub>CN.

## 4.2. Heteroduplex **1a 2b**

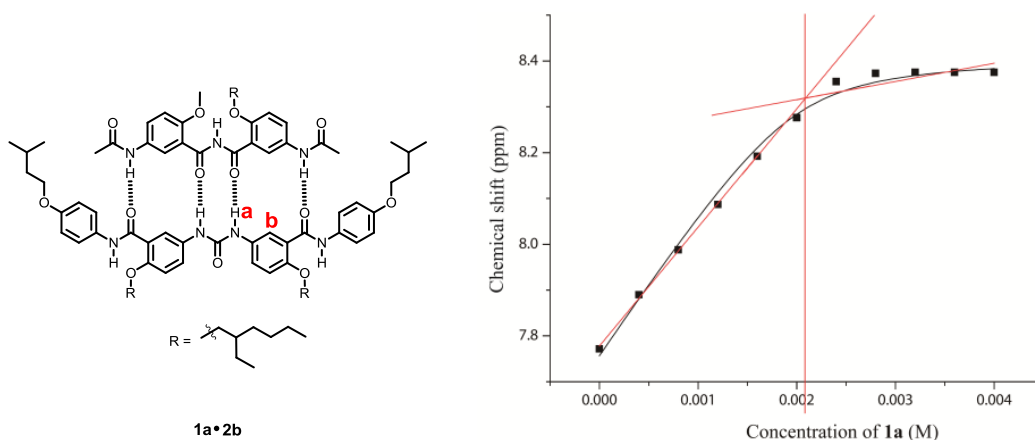

$$K_a = (1.9 \pm 0.8) \times 10^4 \text{ M}^{-1}$$

Figure S4. Determination of the binding constant of **1a 2b** in CDCl<sub>3</sub> at 298K. Fitting result based on H<sub>b</sub>.  $K_a$  is the average value calculated from triplicate measurements, and error is the standard deviation.

The equilibria in the dimeric process contains **1a 1a**, **2b 2b** and **1a 2b**. The  $K_{\text{dim}}$  values of **1a 1a** and **2b 2b** were obtained by NMR dilution experiment, and fixed in the fitting process using ChemEqui 7.23. Chemical shift of **2b** is plotted against number of experimental points corresponding to concentration of **1a**.

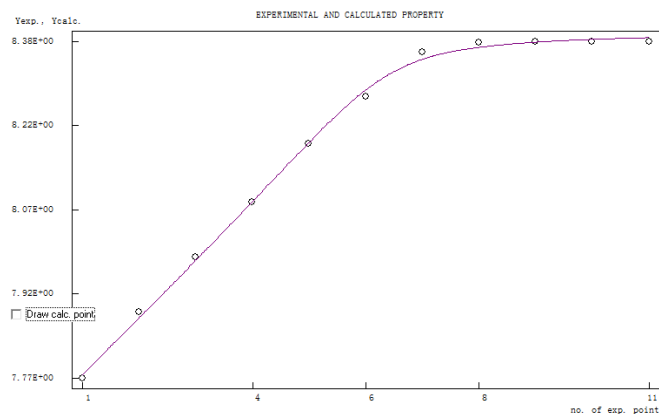

$$K_a = (7.4 \pm 2) \times 10^4 \text{ M}^{-1}$$

**Figure S5.** Determination of  $K_a$  value of **1a 2b** incorporating additional homodimeric equilibria in  $\text{CDCl}_3$  at 298 K. Fitting result based on C-H<sub>b</sub>.  $K_a$  is the average value calculated from triplicate measurements, and error is the standard deviation.

### 4.3. Heteroduplex **1a 2d**

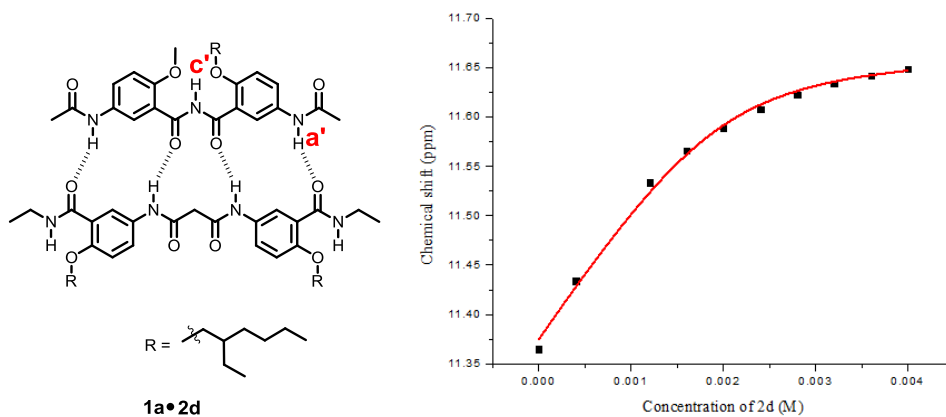

$$K_a = (4.3 \pm 0.5) \times 10^3 \text{ M}^{-1}$$

**Figure S6.** Determination of the binding constant of **1a 2d** in  $\text{CDCl}_3$  298K. Fitting result based on Hc'.  $K_a$  is the average value calculated from triplicate measurements, and error is the standard deviation.

The following compound **9** with two hydrogen bonds was used to demonstrate that **1a** and **2d** can form a matched heterodimer.

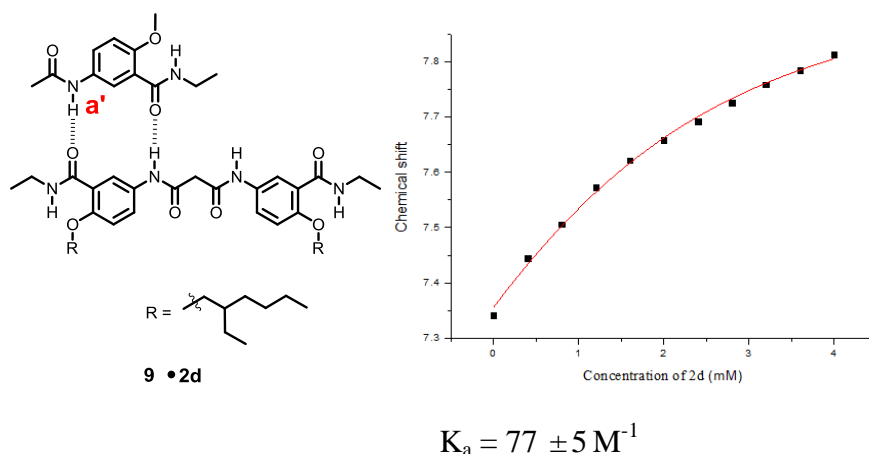

**Figure S7.** Determination of the binding constant of **1a • 2d** in  $\text{CDCl}_3$  298K. Fitting result based on  $\text{Ha}'$  of **1a**.  $K_a$  is the average value calculated from twice measurements, and error is the standard deviation.

#### 4.4. Heteroduplex **1b • 2a**

##### (1) Dilution experiment

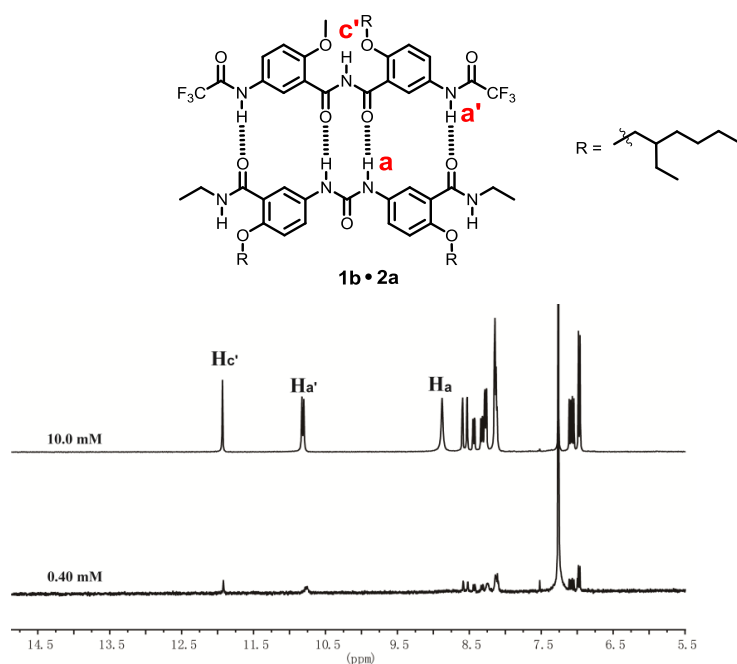

**Figure S8.** Stacked partial  $^1\text{H}$  NMR spectra of compounds **1b** and **2a** (1:1) at 0.40 mM and 10.0 mM in  $\text{CDCl}_3$  (400MHz, 298 K).



## (2) UV/Vis experiments for the binding constant

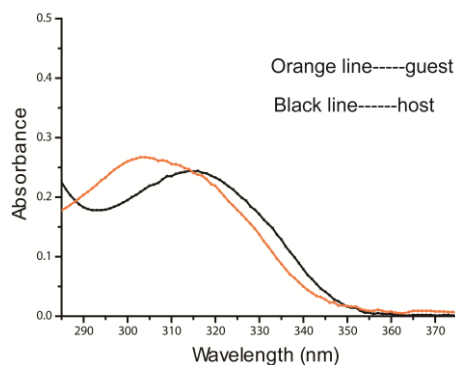

**Figure S9.** UV/Vis spectra of host **1b** (black line) and guest **2a** (orange line) in  $\text{CH}_2\text{Cl}_2$ .

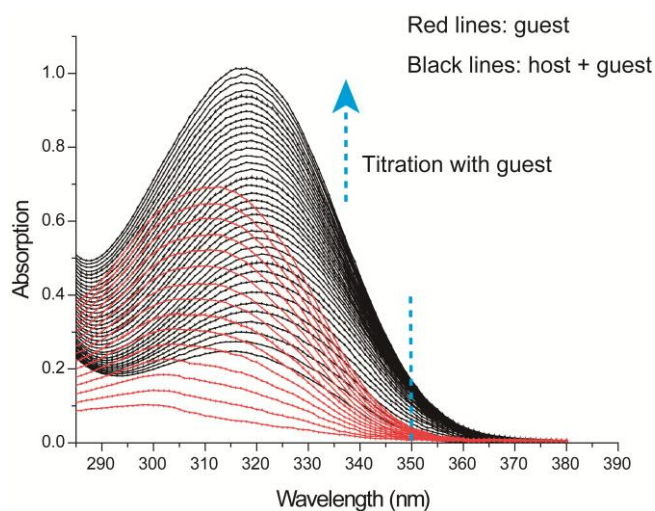

**Figure S10.** UV/Vis spectra of guest (8-120  $\mu\text{M}$ , red lines) and host (40  $\mu\text{M}$ ) titrated with guest (0-3 equiv., black lines).

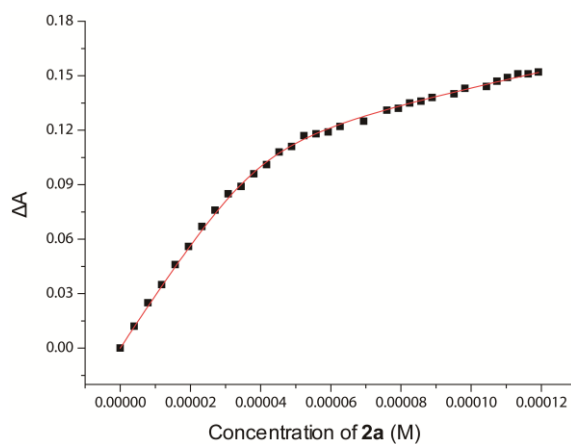

$$K_a = (3.8 \pm 0.7) \times 10^5 \text{ M}^{-1}$$

**Figure S11.** Non-linear curve fitting of  $\Delta A$  with concentration of **2a** at 350 nm in  $\text{CH}_2\text{Cl}_2$ .  $K_a$  is the average value calculated from triplicate measurements, and error is the standard deviation.



#### 4.7. Homoduplex **2a** **2a**

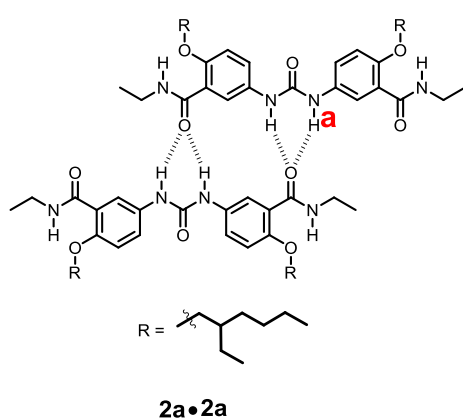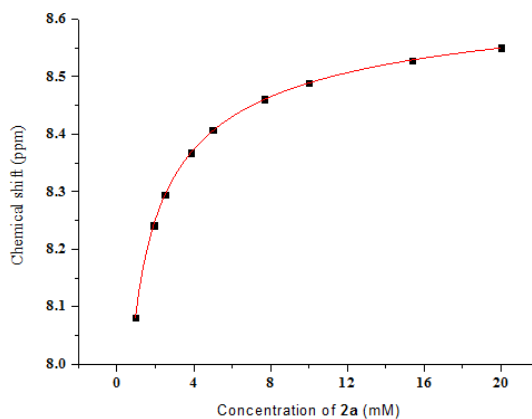

$$K_{\text{dim}} = (5.6 \pm 0.1) \times 10^3 \text{ M}^{-1}$$

**Figure S14.** Determination of the binding constant of **2a** **2a** in  $\text{CDCl}_3$  at 298 K. Fitting result based on  $\text{H}_a$ .  $K_{\text{dim}}$  is the average value calculated from twice measurements, and error is the standard deviation.

#### 4.8. Homoduplex **2b** **2b**

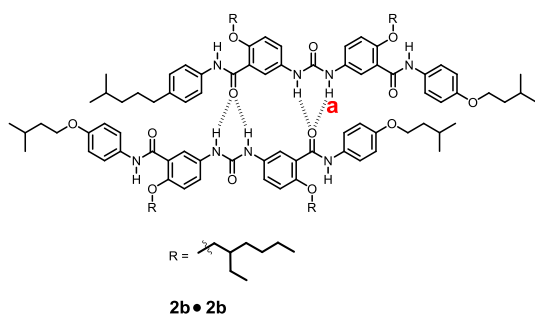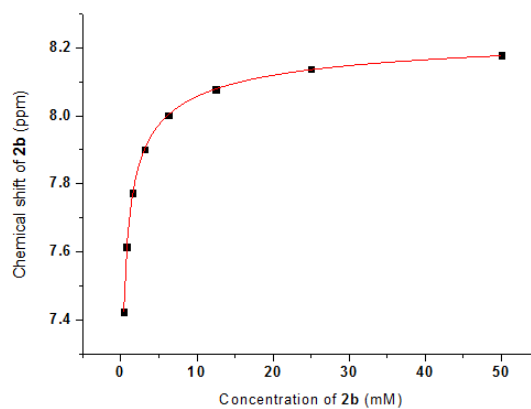

$$K_{\text{dim}} = (2.3 \pm 0.4) \times 10^3 \text{ M}^{-1}$$

**Figure S15.** Determination of the binding constant of **2b** **2b** in  $\text{CDCl}_3$  at 298 K. Fitting result based on  $\text{H}_a$ .  $K_{\text{dim}}$  is the average value calculated from twice measurements, and error is the standard deviation.

## 5. Molecular modelling<sup>2</sup>

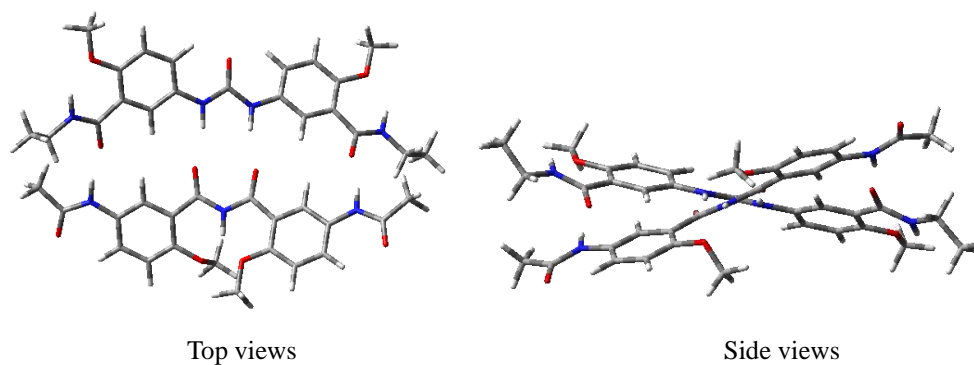

**Figure S16** Optimized structure of heterodimer **1a 2a** obtained by DFT calculation at the B3LYP/6-31G(d) level. Substituents are replaced with methyl groups for simplicity.

**Table S1.** Atomic coordinates for the optimized structure of the heterodimer **1a 2a**.

| Center Number | Atomic Number | Atomic Type | Coordinates (Angstroms) |           |           |
|---------------|---------------|-------------|-------------------------|-----------|-----------|
|               |               |             | X                       | Y         | Z         |
| 1             | 6             | 0           | 4.422381                | -3.963943 | 2.045130  |
| 2             | 6             | 0           | 4.602972                | -2.629605 | 1.652066  |
| 3             | 6             | 0           | 3.504777                | -1.929075 | 1.144116  |
| 4             | 6             | 0           | 2.242034                | -2.514579 | 0.996932  |
| 5             | 6             | 0           | 2.080100                | -3.867070 | 1.388985  |
| 6             | 6             | 0           | 3.171737                | -4.563937 | 1.912356  |
| 7             | 6             | 0           | 1.171125                | -1.606402 | 0.460036  |
| 8             | 7             | 0           | 0.019207                | -2.224041 | -0.023182 |
| 9             | 8             | 0           | 1.338459                | -0.392587 | 0.423469  |
| 10            | 6             | 0           | -1.148973               | -1.606788 | -0.453918 |
| 11            | 8             | 0           | -1.339250               | -0.398344 | -0.388686 |
| 12            | 6             | 0           | -2.218806               | -2.524216 | -0.984858 |
| 13            | 6             | 0           | -3.509102               | -1.982768 | -1.042650 |
| 14            | 6             | 0           | -4.598916               | -2.706446 | -1.539844 |
| 15            | 6             | 0           | -4.391165               | -4.017975 | -2.002283 |
| 16            | 6             | 0           | -3.112766               | -4.564624 | -1.947485 |
| 17            | 6             | 0           | -2.030611               | -3.843987 | -1.444887 |
| 18            | 7             | 0           | 5.828151                | -1.942172 | 1.737587  |
| 19            | 7             | 0           | -5.849395               | -2.065404 | -1.540721 |
| 20            | 8             | 0           | -7.136060               | -3.572822 | -2.712381 |
| 21            | 8             | 0           | 7.107394                | -3.441968 | 2.925156  |
| 22            | 8             | 0           | 0.839725                | -4.429578 | 1.247171  |

|    |   |   |           |           |           |
|----|---|---|-----------|-----------|-----------|
| 23 | 6 | 0 | 0.664784  | -5.815335 | 1.513792  |
| 24 | 8 | 0 | -0.790914 | -4.464878 | -1.377322 |
| 25 | 6 | 0 | -0.072242 | -4.504942 | -2.616018 |
| 26 | 6 | 0 | -8.182238 | -1.536820 | -1.991265 |
| 27 | 6 | 0 | -7.013501 | -2.502507 | -2.127336 |
| 28 | 6 | 0 | 8.105977  | -1.338046 | 2.344601  |
| 29 | 6 | 0 | 6.973358  | -2.355146 | 2.372150  |
| 30 | 1 | 0 | 5.256562  | -4.514432 | 2.457039  |
| 31 | 1 | 0 | 3.627022  | -0.894399 | 0.847421  |
| 32 | 1 | 0 | 3.057292  | -5.593247 | 2.231077  |
| 33 | 1 | 0 | 0.015661  | -3.242384 | -0.027781 |
| 34 | 1 | 0 | -3.662658 | -0.970402 | -0.689041 |
| 35 | 1 | 0 | -5.225495 | -4.583364 | -2.392352 |
| 36 | 1 | 0 | -2.942719 | -5.582145 | -2.287565 |
| 37 | 1 | 0 | 5.843232  | -1.029451 | 1.282929  |
| 38 | 1 | 0 | -5.874053 | -1.166240 | -1.059218 |
| 39 | 1 | 0 | 0.818110  | -6.036438 | 2.576914  |
| 40 | 1 | 0 | -0.365408 | -6.038301 | 1.234781  |
| 41 | 1 | 0 | 1.347307  | -6.426365 | 0.910716  |
| 42 | 1 | 0 | -0.648204 | -5.031782 | -3.385720 |
| 43 | 1 | 0 | 0.160414  | -3.492657 | -2.969137 |
| 44 | 1 | 0 | 0.855228  | -5.046244 | -2.416962 |
| 45 | 1 | 0 | -8.639234 | -1.407990 | -2.976720 |
| 46 | 1 | 0 | -8.939714 | -1.984253 | -1.337778 |
| 47 | 1 | 0 | -7.896290 | -0.560998 | -1.591039 |
| 48 | 1 | 0 | 8.441870  | -1.168297 | 3.372132  |
| 49 | 1 | 0 | 8.952157  | -1.762665 | 1.793494  |
| 50 | 1 | 0 | 7.824211  | -0.383077 | 1.893970  |
| 51 | 6 | 0 | 4.950968  | 3.817082  | -1.374817 |
| 52 | 6 | 0 | 4.754879  | 2.534274  | -0.811793 |
| 53 | 6 | 0 | 3.456192  | 2.160155  | -0.451692 |
| 54 | 6 | 0 | 2.349498  | 2.995341  | -0.642312 |
| 55 | 6 | 0 | 2.566338  | 4.265950  | -1.194556 |
| 56 | 6 | 0 | 3.854541  | 4.663739  | -1.546475 |
| 57 | 7 | 0 | 1.079276  | 2.498621  | -0.302354 |
| 58 | 6 | 0 | -0.041149 | 3.271207  | -0.045470 |
| 59 | 8 | 0 | -0.045326 | 4.499989  | -0.078162 |
| 60 | 7 | 0 | -1.155085 | 2.504254  | 0.251226  |
| 61 | 6 | 0 | -2.429119 | 3.000280  | 0.575091  |
| 62 | 6 | 0 | -3.517244 | 2.124364  | 0.483365  |
| 63 | 6 | 0 | -4.818386 | 2.496340  | 0.836408  |
| 64 | 6 | 0 | -5.037622 | 3.818759  | 1.288923  |
| 65 | 6 | 0 | -3.960923 | 4.703848  | 1.360924  |
| 66 | 6 | 0 | -2.669448 | 4.309378  | 1.017035  |

|     |   |   |           |           |           |
|-----|---|---|-----------|-----------|-----------|
| 67  | 6 | 0 | 5.827411  | 1.511999  | -0.542871 |
| 68  | 6 | 0 | -5.868041 | 1.427362  | 0.683203  |
| 69  | 8 | 0 | -5.630077 | 0.396502  | 0.031835  |
| 70  | 7 | 0 | -7.050189 | 1.610258  | 1.318198  |
| 71  | 8 | 0 | 5.601486  | 0.538316  | 0.194308  |
| 72  | 7 | 0 | 7.018372  | 1.667376  | -1.168298 |
| 73  | 8 | 0 | -6.322859 | 4.185136  | 1.633005  |
| 74  | 6 | 0 | -6.567365 | 5.522754  | 2.045213  |
| 75  | 8 | 0 | 6.234046  | 4.185430  | -1.724437 |
| 76  | 6 | 0 | 6.456352  | 5.490883  | -2.239358 |
| 77  | 6 | 0 | 8.121469  | 0.730295  | -1.015268 |
| 78  | 6 | 0 | -8.128469 | 0.633002  | 1.294485  |
| 79  | 6 | 0 | -8.950134 | 0.691744  | 2.581044  |
| 80  | 6 | 0 | 9.047233  | 0.773833  | -2.229598 |
| 81  | 1 | 0 | 3.316071  | 1.181723  | -0.008821 |
| 82  | 1 | 0 | 1.733176  | 4.939691  | -1.333958 |
| 83  | 1 | 0 | 3.987317  | 5.652879  | -1.967941 |
| 84  | 1 | 0 | 1.034378  | 1.501544  | -0.098410 |
| 85  | 1 | 0 | -1.097627 | 1.498669  | 0.100442  |
| 86  | 1 | 0 | -3.359485 | 1.113665  | 0.127632  |
| 87  | 1 | 0 | -4.111618 | 5.723064  | 1.696328  |
| 88  | 1 | 0 | -1.851809 | 5.012930  | 1.078311  |
| 89  | 1 | 0 | -7.209210 | 2.511269  | 1.751748  |
| 90  | 1 | 0 | 7.169355  | 2.531601  | -1.673663 |
| 91  | 1 | 0 | -6.014485 | 5.768779  | 2.960384  |
| 92  | 1 | 0 | -6.301994 | 6.236332  | 1.255685  |
| 93  | 1 | 0 | -7.639540 | 5.582573  | 2.241917  |
| 94  | 1 | 0 | 7.531405  | 5.562442  | -2.415541 |
| 95  | 1 | 0 | 5.921173  | 5.647016  | -3.184482 |
| 96  | 1 | 0 | 6.153687  | 6.259397  | -1.517925 |
| 97  | 1 | 0 | 8.690142  | 0.953455  | -0.100116 |
| 98  | 1 | 0 | 7.692810  | -0.267357 | -0.886861 |
| 99  | 1 | 0 | -7.674002 | -0.352367 | 1.166262  |
| 100 | 1 | 0 | -8.779855 | 0.802182  | 0.424099  |
| 101 | 1 | 0 | -9.761746 | -0.042532 | 2.547038  |
| 102 | 1 | 0 | -9.404541 | 1.680419  | 2.721809  |
| 103 | 1 | 0 | -8.326507 | 0.475410  | 3.455096  |
| 104 | 1 | 0 | 9.877220  | 0.071974  | -2.098211 |
| 105 | 1 | 0 | 8.509371  | 0.503116  | -3.144660 |
| 106 | 1 | 0 | 9.478262  | 1.773161  | -2.368767 |

---

The total electronic energy is calculated to be -2801.54259639 hartree.

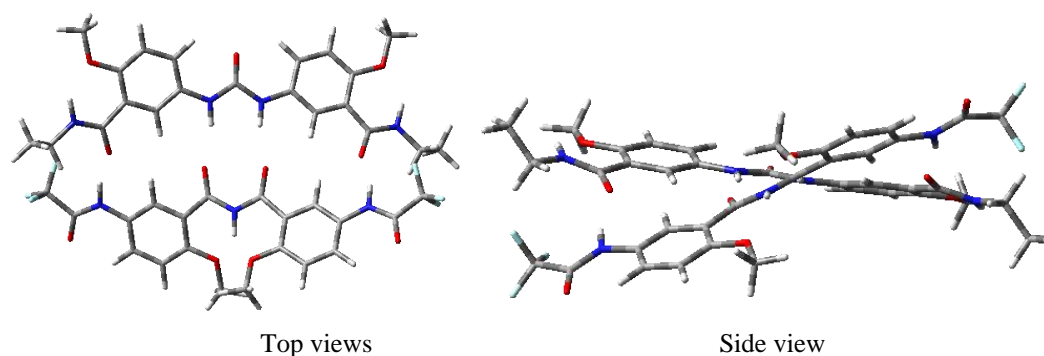

**Figure S17** Optimized structure of heterodimer **1b 2a** obtained by DFT calculation at the B3LYP/6-31G(d) level. Substituents are replaced with methyl groups for simplicity.

**Table S2.** Atomic coordinates for the optimized structure of the heterodimer **1b 2a**.

| Center Number | Atomic Number | Atomic Type | Coordinates (Angstroms) |           |           |
|---------------|---------------|-------------|-------------------------|-----------|-----------|
|               |               |             | X                       | Y         | Z         |
| 1             | 6             | 0           | 4.510750                | -3.791360 | 1.810796  |
| 2             | 6             | 0           | 4.683047                | -2.494627 | 1.308687  |
| 3             | 6             | 0           | 3.562110                | -1.789823 | 0.862297  |
| 4             | 6             | 0           | 2.278346                | -2.343814 | 0.880922  |
| 5             | 6             | 0           | 2.119579                | -3.660197 | 1.379967  |
| 6             | 6             | 0           | 3.237810                | -4.357183 | 1.843917  |
| 7             | 6             | 0           | 1.179414                | -1.434591 | 0.400188  |
| 8             | 7             | 0           | -0.000025               | -2.053306 | -0.000123 |
| 9             | 8             | 0           | 1.355102                | -0.224515 | 0.335734  |
| 10            | 6             | 0           | -1.179450               | -1.434566 | -0.400429 |
| 11            | 8             | 0           | -1.355109               | -0.224486 | -0.335981 |
| 12            | 6             | 0           | -2.278422               | -2.343764 | -0.881112 |
| 13            | 6             | 0           | -3.562208               | -1.789833 | -0.862201 |
| 14            | 6             | 0           | -4.683177               | -2.494616 | -1.308551 |
| 15            | 6             | 0           | -4.510890               | -3.791257 | -1.810900 |
| 16            | 6             | 0           | -3.237926               | -4.357009 | -1.844315 |
| 17            | 6             | 0           | -2.119658               | -3.660046 | -1.380417 |
| 18            | 7             | 0           | 5.935842                | -1.844410 | 1.227279  |
| 19            | 7             | 0           | -5.935987               | -1.844463 | -1.226880 |
| 20            | 8             | 0           | -7.300137               | -3.327363 | -2.369232 |
| 21            | 8             | 0           | 7.299882                | -3.327377 | 2.369678  |
| 22            | 8             | 0           | 0.856497                | -4.190994 | 1.392402  |
| 23            | 6             | 0           | 0.649409                | -5.475313 | 1.967455  |
| 24            | 8             | 0           | -0.856551               | -4.190774 | -1.393133 |
| 25            | 6             | 0           | -0.649384               | -5.474688 | -1.969065 |
| 26            | 6             | 0           | -8.303614               | -1.347917 | -1.485782 |
| 27            | 6             | 0           | -7.103066               | -2.288779 | -1.756573 |

|    |   |   |           |           |           |
|----|---|---|-----------|-----------|-----------|
| 28 | 6 | 0 | 8.303432  | -1.347863 | 1.486466  |
| 29 | 6 | 0 | 7.102865  | -2.288752 | 1.757071  |
| 30 | 9 | 0 | -9.217881 | -1.468154 | -2.450135 |
| 31 | 9 | 0 | -8.888916 | -1.668128 | -0.308553 |
| 32 | 9 | 0 | -7.936015 | -0.047607 | -1.412940 |
| 33 | 9 | 0 | 9.217637  | -1.468202 | 2.450864  |
| 34 | 9 | 0 | 8.888810  | -1.667956 | 0.309239  |
| 35 | 9 | 0 | 7.935841  | -0.047545 | 1.413730  |
| 36 | 1 | 0 | 5.363425  | -4.345832 | 2.176371  |
| 37 | 1 | 0 | 3.685187  | -0.783337 | 0.482428  |
| 38 | 1 | 0 | 3.131176  | -5.359277 | 2.241409  |
| 39 | 1 | 0 | -0.000028 | -3.068253 | -0.000089 |
| 40 | 1 | 0 | -3.685281 | -0.783410 | -0.482161 |
| 41 | 1 | 0 | -5.363593 | -4.345711 | -2.176435 |
| 42 | 1 | 0 | -3.131303 | -5.359035 | -2.241982 |
| 43 | 1 | 0 | 5.936911  | -0.956681 | 0.711419  |
| 44 | 1 | 0 | -5.937008 | -0.956767 | -0.710965 |
| 45 | 1 | 0 | 0.948010  | -5.489116 | 3.022198  |
| 46 | 1 | 0 | -0.422633 | -5.662381 | 1.889814  |
| 47 | 1 | 0 | 1.198161  | -6.253325 | 1.422268  |
| 48 | 1 | 0 | -1.197796 | -6.253168 | -1.424202 |
| 49 | 1 | 0 | -0.948323 | -5.487878 | -3.023719 |
| 50 | 1 | 0 | 0.422721  | -5.661593 | -1.891888 |
| 51 | 6 | 0 | 4.987969  | 3.955327  | -1.429937 |
| 52 | 6 | 0 | 4.736476  | 2.609763  | -1.070544 |
| 53 | 6 | 0 | 3.436947  | 2.259736  | -0.692360 |
| 54 | 6 | 0 | 2.380611  | 3.178244  | -0.663784 |
| 55 | 6 | 0 | 2.652063  | 4.507790  | -1.017611 |
| 56 | 6 | 0 | 3.942997  | 4.879504  | -1.389456 |
| 57 | 7 | 0 | 1.109558  | 2.697826  | -0.304550 |
| 58 | 6 | 0 | 0.000025  | 3.468268  | -0.000234 |
| 59 | 8 | 0 | 0.000044  | 4.697755  | -0.000262 |
| 60 | 7 | 0 | -1.109526 | 2.697870  | 0.304105  |
| 61 | 6 | 0 | -2.380555 | 3.178315  | 0.663384  |
| 62 | 6 | 0 | -3.436848 | 2.259764  | 0.692264  |
| 63 | 6 | 0 | -4.736348 | 2.609814  | 1.070518  |
| 64 | 6 | 0 | -4.987866 | 3.955438  | 1.429663  |
| 65 | 6 | 0 | -3.942945 | 4.879658  | 1.388858  |
| 66 | 6 | 0 | -2.652033 | 4.507925  | 1.016946  |
| 67 | 6 | 0 | 5.744934  | 1.490214  | -1.045627 |
| 68 | 6 | 0 | -5.744767 | 1.490225  | 1.045944  |
| 69 | 8 | 0 | -5.463862 | 0.405153  | 0.504825  |
| 70 | 7 | 0 | -6.925740 | 1.692714  | 1.671320  |
| 71 | 8 | 0 | 5.463938  | 0.405188  | -0.504462 |



|     |   |   |           |           |           |
|-----|---|---|-----------|-----------|-----------|
| 72  | 7 | 0 | 6.926057  | 1.692701  | -1.670722 |
| 73  | 8 | 0 | -6.270460 | 4.303588  | 1.799174  |
| 74  | 6 | 0 | -6.549566 | 5.660223  | 2.116359  |
| 75  | 8 | 0 | 6.270585  | 4.303476  | -1.799368 |
| 76  | 6 | 0 | 6.549647  | 5.660057  | -2.116827 |
| 77  | 6 | 0 | 7.974305  | 0.685965  | -1.770603 |
| 78  | 6 | 0 | -7.973902 | 0.685918  | 1.771524  |
| 79  | 6 | 0 | -8.668027 | 0.747507  | 3.131394  |
| 80  | 6 | 0 | 8.668263  | 0.746981  | -3.130587 |
| 81  | 1 | 0 | 3.254886  | 1.229433  | -0.414075 |
| 82  | 1 | 0 | 1.860010  | 5.241803  | -0.990744 |
| 83  | 1 | 0 | 4.118836  | 5.915452  | -1.654010 |
| 84  | 1 | 0 | 1.050437  | 1.692875  | -0.153752 |
| 85  | 1 | 0 | -1.050408 | 1.692904  | 0.153412  |
| 86  | 1 | 0 | -3.254772 | 1.229412  | 0.414167  |
| 87  | 1 | 0 | -4.118802 | 5.915656  | 1.653205  |
| 88  | 1 | 0 | -1.860013 | 5.241965  | 0.989834  |
| 89  | 1 | 0 | -7.105257 | 2.624498  | 2.024748  |
| 90  | 1 | 0 | 7.105583  | 2.624442  | -2.024257 |
| 91  | 1 | 0 | -5.973021 | 5.995594  | 2.987379  |
| 92  | 1 | 0 | -6.339907 | 6.318346  | 1.264597  |
| 93  | 1 | 0 | -7.615101 | 5.698245  | 2.350184  |
| 94  | 1 | 0 | 7.615207  | 5.698089  | -2.350539 |
| 95  | 1 | 0 | 5.973182  | 5.995196  | -2.987988 |
| 96  | 1 | 0 | 6.339852  | 6.318359  | -1.265237 |
| 97  | 1 | 0 | 8.705721  | 0.820275  | -0.963754 |
| 98  | 1 | 0 | 7.506085  | -0.287239 | -1.614866 |
| 99  | 1 | 0 | -7.505558 | -0.287315 | 1.616304  |
| 100 | 1 | 0 | -8.705233 | 0.819770  | 0.964524  |
| 101 | 1 | 0 | -9.461984 | -0.005035 | 3.184046  |
| 102 | 1 | 0 | -9.130164 | 1.727937  | 3.302371  |
| 103 | 1 | 0 | -7.958992 | 0.559486  | 3.944624  |
| 104 | 1 | 0 | 9.462301  | -0.005496 | -3.182973 |
| 105 | 1 | 0 | 7.959150  | 0.558487  | -3.943639 |
| 106 | 1 | 0 | 9.130262  | 1.727382  | -3.302095 |

---

The total electronic energy is calculated to be -3396.96636668 hartree.

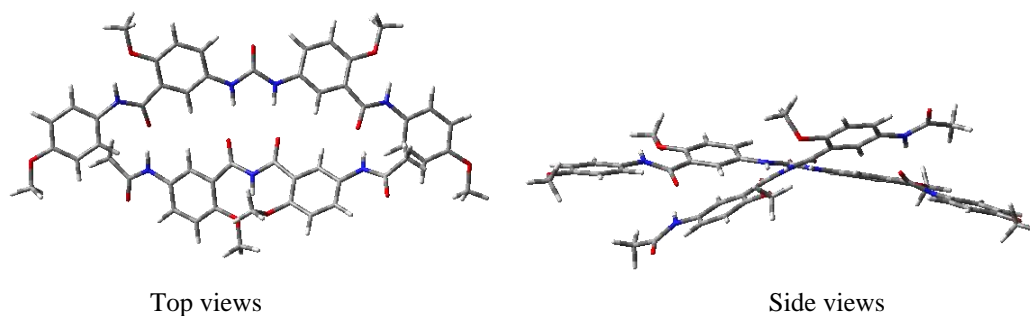

**Figure S18** Optimized structure of heterodimer **1a 2b** obtained by DFT calculation at the B3LYP/6-31G(d) level. Substituents are replaced with methyl groups for simplicity.

**Table S3.** Atomic coordinates for the optimized structure of the heterodimer **1a 2b**.

| Center Number | Atomic Number | Atomic Type | Coordinates (Angstroms) |           |           |
|---------------|---------------|-------------|-------------------------|-----------|-----------|
|               |               |             | X                       | Y         | Z         |
| 1             | 6             | 0           | -4.165676               | -3.872916 | -2.037729 |
| 2             | 6             | 0           | -4.344807               | -2.498391 | -1.824266 |
| 3             | 6             | 0           | -3.316742               | -1.779649 | -1.208914 |
| 4             | 6             | 0           | -2.127925               | -2.380168 | -0.779683 |
| 5             | 6             | 0           | -1.973288               | -3.775057 | -0.982212 |
| 6             | 6             | 0           | -2.990088               | -4.492404 | -1.617099 |
| 7             | 6             | 0           | -1.119515               | -1.438727 | -0.182680 |
| 8             | 7             | 0           | -0.012723               | -2.014679 | 0.439446  |
| 9             | 8             | 0           | -1.287864               | -0.225131 | -0.236146 |
| 10            | 6             | 0           | 1.133010                | -1.356964 | 0.870378  |
| 11            | 8             | 0           | 1.322994                | -0.157268 | 0.710046  |
| 12            | 6             | 0           | 2.185742                | -2.217354 | 1.514952  |
| 13            | 6             | 0           | 3.477442                | -1.678738 | 1.533290  |
| 14            | 6             | 0           | 4.556711                | -2.352289 | 2.115920  |
| 15            | 6             | 0           | 4.333088                | -3.604151 | 2.716249  |
| 16            | 6             | 0           | 3.050843                | -4.146051 | 2.704107  |
| 17            | 6             | 0           | 1.981285                | -3.479310 | 2.108934  |
| 18            | 7             | 0           | -5.502303               | -1.785371 | -2.191571 |
| 19            | 7             | 0           | 5.812348                | -1.724251 | 2.053314  |
| 20            | 8             | 0           | 7.084197                | -3.107086 | 3.380561  |
| 21            | 8             | 0           | -6.585725               | -3.328866 | -3.506097 |
| 22            | 8             | 0           | -0.815062               | -4.361075 | -0.547510 |
| 23            | 6             | 0           | -0.674431               | -5.775360 | -0.604995 |
| 24            | 8             | 0           | 0.738336                | -4.096823 | 2.088794  |
| 25            | 6             | 0           | -0.030369               | -3.928545 | 3.285728  |
| 26            | 6             | 0           | 8.133962                | -1.136836 | 2.492789  |
| 27            | 6             | 0           | 6.974178                | -2.101321 | 2.688446  |
| 28            | 6             | 0           | -7.568213               | -1.145430 | -3.310876 |

|    |   |   |           |           |           |
|----|---|---|-----------|-----------|-----------|
| 29 | 6 | 0 | -6.517631 | -2.205934 | -3.016941 |
| 30 | 1 | 0 | -4.939962 | -4.440075 | -2.535319 |
| 31 | 1 | 0 | -3.433569 | -0.715077 | -1.050873 |
| 32 | 1 | 0 | -2.873905 | -5.554715 | -1.796602 |
| 33 | 1 | 0 | -0.014834 | -3.029426 | 0.528820  |
| 34 | 1 | 0 | 3.641349  | -0.711357 | 1.074717  |
| 35 | 1 | 0 | 5.158331  | -4.128273 | 3.177076  |
| 36 | 1 | 0 | 2.867798  | -5.118358 | 3.152792  |
| 37 | 1 | 0 | -5.572835 | -0.851950 | -1.790672 |
| 38 | 1 | 0 | 5.843744  | -0.888373 | 1.470883  |
| 39 | 1 | 0 | -0.628136 | -6.127039 | -1.642580 |
| 40 | 1 | 0 | 0.264858  | -5.993112 | -0.096132 |
| 41 | 1 | 0 | -1.499082 | -6.277313 | -0.084562 |
| 42 | 1 | 0 | 0.508493  | -4.324140 | 4.154890  |
| 43 | 1 | 0 | -0.265173 | -2.870635 | 3.457610  |
| 44 | 1 | 0 | -0.955669 | -4.490133 | 3.140318  |
| 45 | 1 | 0 | 9.044405  | -1.715045 | 2.315653  |
| 46 | 1 | 0 | 7.984855  | -0.433455 | 1.670050  |
| 47 | 1 | 0 | 8.279327  | -0.571006 | 3.420390  |
| 48 | 1 | 0 | -8.558712 | -1.560108 | -3.103702 |
| 49 | 1 | 0 | -7.439603 | -0.226354 | -2.734263 |
| 50 | 1 | 0 | -7.529063 | -0.907847 | -4.379533 |
| 51 | 6 | 0 | -5.105604 | 4.002566  | 0.938202  |
| 52 | 6 | 0 | -4.825444 | 2.690730  | 0.485800  |
| 53 | 6 | 0 | -3.485322 | 2.322831  | 0.317224  |
| 54 | 6 | 0 | -2.421498 | 3.191776  | 0.585760  |
| 55 | 6 | 0 | -2.722853 | 4.487117  | 1.031662  |
| 56 | 6 | 0 | -4.050151 | 4.877613  | 1.196383  |
| 57 | 7 | 0 | -1.112243 | 2.705165  | 0.420928  |
| 58 | 6 | 0 | 0.021707  | 3.488844  | 0.276639  |
| 59 | 8 | 0 | 0.005867  | 4.718110  | 0.301284  |
| 60 | 7 | 0 | 1.169920  | 2.735836  | 0.104748  |
| 61 | 6 | 0 | 2.465190  | 3.231544  | -0.118761 |
| 62 | 6 | 0 | 3.516670  | 2.306696  | -0.160508 |
| 63 | 6 | 0 | 4.841295  | 2.677562  | -0.416361 |
| 64 | 6 | 0 | 5.123750  | 4.047609  | -0.631655 |
| 65 | 6 | 0 | 4.084757  | 4.975994  | -0.572913 |
| 66 | 6 | 0 | 2.769763  | 4.585671  | -0.324652 |
| 67 | 6 | 0 | -5.833758 | 1.623924  | 0.149287  |
| 68 | 6 | 0 | 5.835391  | 1.548334  | -0.440631 |
| 69 | 8 | 0 | 5.545938  | 0.440234  | 0.036410  |
| 70 | 7 | 0 | 7.027836  | 1.791822  | -1.055749 |
| 71 | 8 | 0 | -5.486950 | 0.598862  | -0.454466 |
| 72 | 7 | 0 | -7.113035 | 1.826945  | 0.578085  |

|     |   |   |            |           |           |
|-----|---|---|------------|-----------|-----------|
| 73  | 8 | 0 | 6.431722   | 4.409535  | -0.882632 |
| 74  | 6 | 0 | 6.740133   | 5.784388  | -1.072395 |
| 75  | 8 | 0 | -6.426242  | 4.370040  | 1.097475  |
| 76  | 6 | 0 | -6.727238  | 5.683606  | 1.550499  |
| 77  | 6 | 0 | -8.227171  | 0.967913  | 0.442272  |
| 78  | 6 | 0 | 8.091887   | 0.893313  | -1.295460 |
| 79  | 6 | 0 | 7.949153   | -0.498795 | -1.318849 |
| 80  | 6 | 0 | 9.042915   | -1.317640 | -1.614053 |
| 81  | 6 | 0 | 10.292621  | -0.758658 | -1.898557 |
| 82  | 6 | 0 | 10.436501  | 0.636447  | -1.882242 |
| 83  | 6 | 0 | 9.352355   | 1.446589  | -1.582791 |
| 84  | 8 | 0 | 11.419180  | -1.469533 | -2.200531 |
| 85  | 6 | 0 | -9.506339  | 1.547209  | 0.511976  |
| 86  | 6 | 0 | -10.649249 | 0.766232  | 0.433945  |
| 87  | 6 | 0 | -10.545495 | -0.623596 | 0.276167  |
| 88  | 6 | 0 | -9.277039  | -1.209007 | 0.211773  |
| 89  | 6 | 0 | -8.126533  | -0.419953 | 0.299674  |
| 90  | 8 | 0 | -11.727331 | -1.303966 | 0.197472  |
| 91  | 6 | 0 | 11.324217  | -2.884164 | -2.246623 |
| 92  | 6 | 0 | -11.677688 | -2.710255 | 0.017445  |
| 93  | 1 | 0 | -3.278707  | 1.318612  | -0.031633 |
| 94  | 1 | 0 | -1.923361  | 5.184989  | 1.232788  |
| 95  | 1 | 0 | -4.247205  | 5.887130  | 1.537019  |
| 96  | 1 | 0 | -1.033022  | 1.703695  | 0.250491  |
| 97  | 1 | 0 | 1.099226   | 1.725410  | 0.210090  |
| 98  | 1 | 0 | 3.309339   | 1.255786  | -0.000621 |
| 99  | 1 | 0 | 4.283680   | 6.030247  | -0.725067 |
| 100 | 1 | 0 | 1.980556   | 5.321961  | -0.285927 |
| 101 | 1 | 0 | 7.189769   | 2.758314  | -1.317337 |
| 102 | 1 | 0 | -7.296501  | 2.742367  | 0.974117  |
| 103 | 1 | 0 | 6.217357   | 6.195920  | -1.944433 |
| 104 | 1 | 0 | 6.486981   | 6.373201  | -0.182773 |
| 105 | 1 | 0 | 7.817723   | 5.827413  | -1.240592 |
| 106 | 1 | 0 | -7.816167  | 5.739034  | 1.599850  |
| 107 | 1 | 0 | -6.306542  | 5.869662  | 2.546200  |
| 108 | 1 | 0 | -6.355772  | 6.439819  | 0.848852  |
| 109 | 1 | 0 | 6.985923   | -0.942069 | -1.108549 |
| 110 | 1 | 0 | 8.897773   | -2.391873 | -1.623226 |
| 111 | 1 | 0 | 11.409263  | 1.063269  | -2.104904 |
| 112 | 1 | 0 | 9.479913   | 2.526786  | -1.569235 |
| 113 | 1 | 0 | -9.601586  | 2.625091  | 0.622951  |
| 114 | 1 | 0 | -11.636999 | 1.213185  | 0.485480  |
| 115 | 1 | 0 | -9.162576  | -2.281125 | 0.099093  |
| 116 | 1 | 0 | -7.152102  | -0.885948 | 0.255887  |

|     |   |   |            |           |           |
|-----|---|---|------------|-----------|-----------|
| 117 | 1 | 0 | 12.321312  | -3.242969 | -2.508390 |
| 118 | 1 | 0 | 10.607643  | -3.216165 | -3.009723 |
| 119 | 1 | 0 | 11.032814  | -3.302026 | -1.273781 |
| 120 | 1 | 0 | -12.716178 | -3.042512 | -0.033800 |
| 121 | 1 | 0 | -11.179254 | -3.208885 | 0.859466  |
| 122 | 1 | 0 | -11.163975 | -2.980106 | -0.914868 |

The total electronic energy is calculated to be -3335.43542298 hartree.

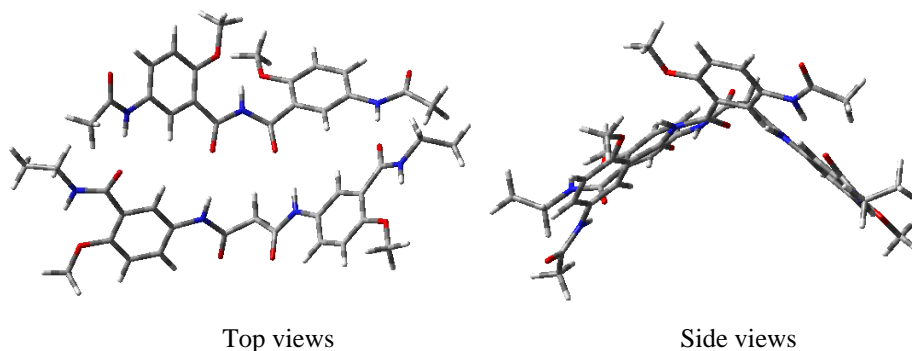

**Figure S19** Optimized structure of heterodimer **1a 2d** obtained by DFT calculation at the B3LYP/6-31G(d) level. Substituents are replaced with methyl groups for simplicity.

**Table S4.** Atomic coordinates for the optimized structure of the heterodimer **1a 2d**.

| Center Number | Atomic Number | Atomic Type | Coordinates (Angstroms) |           |           |
|---------------|---------------|-------------|-------------------------|-----------|-----------|
|               |               |             | X                       | Y         | Z         |
| 1             | 6             | 0           | 4.961163                | -2.507628 | 1.315083  |
| 2             | 6             | 0           | 4.929934                | -3.798900 | 1.895540  |
| 3             | 6             | 0           | 3.924424                | -4.694487 | 1.523332  |
| 4             | 6             | 0           | 2.932857                | -4.342712 | 0.607904  |
| 5             | 6             | 0           | 2.939635                | -3.063511 | 0.036984  |
| 6             | 6             | 0           | 3.963894                | -2.182023 | 0.394433  |
| 7             | 7             | 0           | 1.979155                | -2.593358 | -0.874901 |
| 8             | 6             | 0           | 0.968327                | -3.299875 | -1.478593 |
| 9             | 6             | 0           | 0.186609                | -2.452164 | -2.495726 |
| 10            | 8             | 0           | 0.730061                | -4.482086 | -1.276679 |
| 11            | 6             | 0           | 5.968309                | -1.417397 | 1.582419  |
| 12            | 8             | 0           | 5.980497                | -0.386016 | 0.890164  |
| 13            | 7             | 0           | 6.822725                | -1.591320 | 2.618713  |
| 14            | 6             | 0           | 7.835796                | -0.615411 | 2.995358  |
| 15            | 6             | 0           | -1.250335               | -2.933090 | -2.654522 |
| 16            | 8             | 0           | -1.558732               | -3.790983 | -3.469000 |
| 17            | 7             | 0           | -2.137104               | -2.310441 | -1.803673 |
| 18            | 6             | 0           | 4.790665                | 3.613428  | -2.245707 |

|    |   |   |           |           |           |
|----|---|---|-----------|-----------|-----------|
| 19 | 6 | 0 | 4.882655  | 2.447328  | -1.469364 |
| 20 | 6 | 0 | 3.696559  | 1.800448  | -1.104159 |
| 21 | 6 | 0 | 2.437497  | 2.288773  | -1.465651 |
| 22 | 6 | 0 | 2.360562  | 3.473841  | -2.231036 |
| 23 | 6 | 0 | 3.542390  | 4.109542  | -2.619204 |
| 24 | 6 | 0 | 1.261021  | 1.457059  | -1.041651 |
| 25 | 7 | 0 | 0.110608  | 2.155820  | -0.713752 |
| 26 | 8 | 0 | 1.359871  | 0.240745  | -0.921359 |
| 27 | 6 | 0 | -1.085976 | 1.625862  | -0.217566 |
| 28 | 8 | 0 | -1.388672 | 0.447212  | -0.348253 |
| 29 | 6 | 0 | -1.965551 | 2.584773  | 0.543796  |
| 30 | 6 | 0 | -3.044063 | 1.995252  | 1.215806  |
| 31 | 6 | 0 | -3.897238 | 2.719524  | 2.054555  |
| 32 | 6 | 0 | -3.667201 | 4.092220  | 2.219796  |
| 33 | 6 | 0 | -2.613867 | 4.704761  | 1.545473  |
| 34 | 6 | 0 | -1.762630 | 3.979165  | 0.710092  |
| 35 | 7 | 0 | 6.096174  | 1.882098  | -1.038215 |
| 36 | 7 | 0 | -4.938316 | 2.022398  | 2.695585  |
| 37 | 8 | 0 | -5.500540 | 3.512560  | 4.355955  |
| 38 | 8 | 0 | 7.625935  | 3.274949  | -2.046861 |
| 39 | 8 | 0 | 1.109803  | 3.927650  | -2.561480 |
| 40 | 6 | 0 | 0.996299  | 5.012952  | -3.471247 |
| 41 | 8 | 0 | -0.729492 | 4.573944  | 0.027004  |
| 42 | 6 | 0 | -0.438747 | 5.947288  | 0.253927  |
| 43 | 6 | 0 | -6.593592 | 1.374885  | 4.359430  |
| 44 | 6 | 0 | -5.632076 | 2.420957  | 3.812572  |
| 45 | 6 | 0 | 8.473399  | 1.436524  | -0.756513 |
| 46 | 6 | 0 | 7.369670  | 2.299738  | -1.348838 |
| 47 | 6 | 0 | 9.247988  | -1.020315 | 2.560752  |
| 48 | 8 | 0 | 5.909627  | -4.124883 | 2.807767  |
| 49 | 6 | 0 | 5.898997  | -5.418635 | 3.398267  |
| 50 | 6 | 0 | -5.629927 | -1.912167 | -0.622299 |
| 51 | 6 | 0 | -6.303028 | -2.894605 | -1.385992 |
| 52 | 6 | 0 | -5.574524 | -3.692579 | -2.268982 |
| 53 | 6 | 0 | -4.199854 | -3.530447 | -2.430925 |
| 54 | 6 | 0 | -3.519365 | -2.551514 | -1.692779 |
| 55 | 6 | 0 | -4.249782 | -1.769712 | -0.791692 |
| 56 | 6 | 0 | -6.263503 | -0.975912 | 0.371050  |
| 57 | 8 | 0 | -5.560865 | -0.359109 | 1.188441  |
| 58 | 7 | 0 | -7.603134 | -0.797214 | 0.301910  |
| 59 | 6 | 0 | -8.327759 | 0.117754  | 1.172243  |
| 60 | 6 | 0 | -9.671060 | 0.501165  | 0.555396  |
| 61 | 8 | 0 | -7.664791 | -3.026813 | -1.215637 |
| 62 | 6 | 0 | -8.349320 | -4.045794 | -1.932483 |

|     |   |   |            |           |           |
|-----|---|---|------------|-----------|-----------|
| 63  | 1 | 0 | 3.894640   | -5.689437 | 1.951069  |
| 64  | 1 | 0 | 2.158640   | -5.046188 | 0.334519  |
| 65  | 1 | 0 | 4.009946   | -1.198121 | -0.055650 |
| 66  | 1 | 0 | 1.992751   | -1.590117 | -1.039312 |
| 67  | 1 | 0 | 0.670141   | -2.585420 | -3.469527 |
| 68  | 1 | 0 | 0.232095   | -1.392082 | -2.229406 |
| 69  | 1 | 0 | 6.784249   | -2.479431 | 3.102926  |
| 70  | 1 | 0 | 7.799165   | -0.487288 | 4.084420  |
| 71  | 1 | 0 | 7.549066   | 0.334402  | 2.540497  |
| 72  | 1 | 0 | -1.777184  | -1.549045 | -1.233585 |
| 73  | 1 | 0 | 5.696559   | 4.117839  | -2.550525 |
| 74  | 1 | 0 | 3.741312   | 0.897341  | -0.505962 |
| 75  | 1 | 0 | 3.506577   | 5.008834  | -3.223030 |
| 76  | 1 | 0 | 0.165868   | 3.169856  | -0.743568 |
| 77  | 1 | 0 | -3.193466  | 0.928988  | 1.093633  |
| 78  | 1 | 0 | -4.302671  | 4.663766  | 2.881534  |
| 79  | 1 | 0 | -2.465508  | 5.769069  | 1.682962  |
| 80  | 1 | 0 | 6.013916   | 1.067187  | -0.431857 |
| 81  | 1 | 0 | -5.162903  | 1.110476  | 2.295784  |
| 82  | 1 | 0 | -0.073900  | 5.152686  | -3.632416 |
| 83  | 1 | 0 | 1.484341   | 4.783442  | -4.426307 |
| 84  | 1 | 0 | 1.425738   | 5.935393  | -3.058817 |
| 85  | 1 | 0 | -0.220638  | 6.138045  | 1.311301  |
| 86  | 1 | 0 | 0.446420   | 6.161688  | -0.346494 |
| 87  | 1 | 0 | -1.267040  | 6.588184  | -0.071287 |
| 88  | 1 | 0 | -7.599993  | 1.803666  | 4.403646  |
| 89  | 1 | 0 | -6.297379  | 1.141158  | 5.387296  |
| 90  | 1 | 0 | -6.613847  | 0.451773  | 3.775035  |
| 91  | 1 | 0 | 9.061374   | 1.013329  | -1.577832 |
| 92  | 1 | 0 | 8.099005   | 0.627918  | -0.124626 |
| 93  | 1 | 0 | 9.144492   | 2.077616  | -0.176023 |
| 94  | 1 | 0 | 9.976349   | -0.265990 | 2.880140  |
| 95  | 1 | 0 | 9.307123   | -1.117383 | 1.471885  |
| 96  | 1 | 0 | 9.540241   | -1.979778 | 3.003384  |
| 97  | 1 | 0 | 6.754942   | -5.443445 | 4.074980  |
| 98  | 1 | 0 | 6.011632   | -6.202504 | 2.639868  |
| 99  | 1 | 0 | 4.977744   | -5.590088 | 3.968144  |
| 100 | 1 | 0 | -6.070556  | -4.458412 | -2.853472 |
| 101 | 1 | 0 | -3.652418  | -4.149953 | -3.126384 |
| 102 | 1 | 0 | -3.745678  | -1.012642 | -0.201681 |
| 103 | 1 | 0 | -8.122338  | -1.408794 | -0.315649 |
| 104 | 1 | 0 | -8.481251  | -0.336305 | 2.162056  |
| 105 | 1 | 0 | -7.704254  | 1.003513  | 1.323508  |
| 106 | 1 | 0 | -10.209054 | 1.187856  | 1.216783  |

|     |   |   |            |           |           |
|-----|---|---|------------|-----------|-----------|
| 107 | 1 | 0 | -9.532751  | 0.995079  | -0.412414 |
| 108 | 1 | 0 | -10.307603 | -0.379282 | 0.403547  |
| 109 | 1 | 0 | -9.393808  | -3.977180 | -1.622990 |
| 110 | 1 | 0 | -8.279004  | -3.890851 | -3.016209 |
| 111 | 1 | 0 | -7.958965  | -5.038781 | -1.679717 |

The total electronic energy is calculated to be -2954.18631365 hartree.

## 6. $^1\text{H}$ NMR and $^{13}\text{C}$ NMR of compounds 1a, 1b and 2a-2d

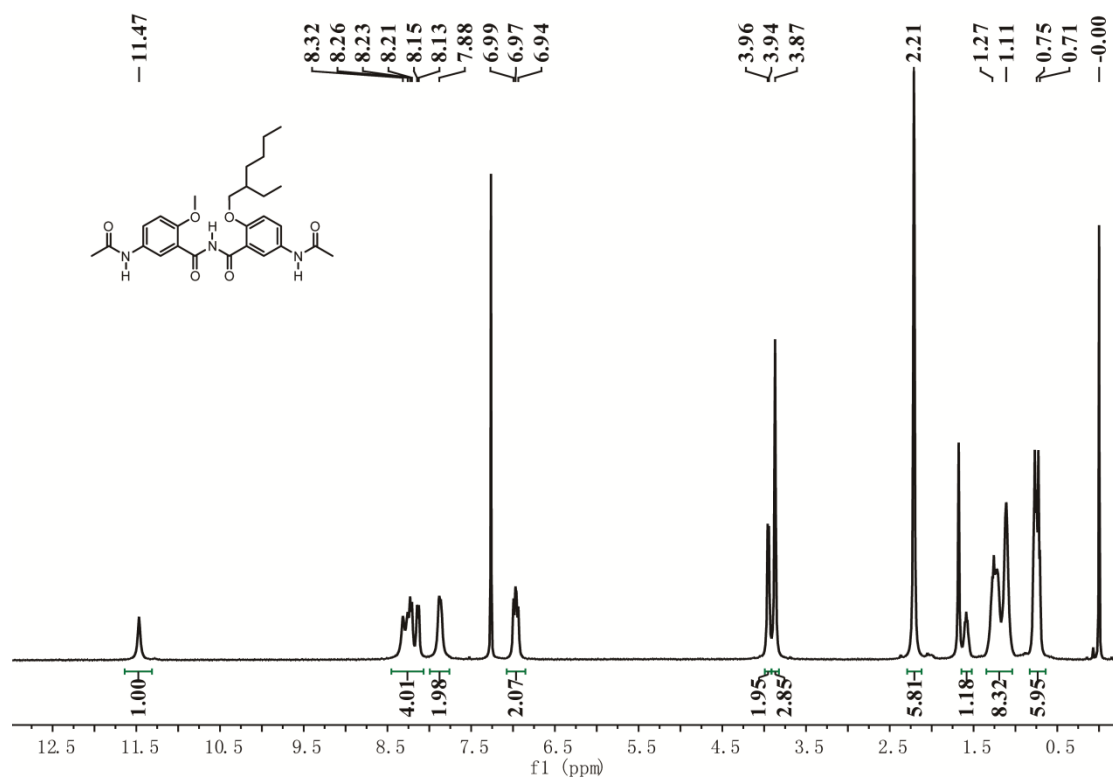

Figure S20.  $^1\text{H}$  NMR spectrum (400 MHz,  $\text{CDCl}_3$ ) of 1a.



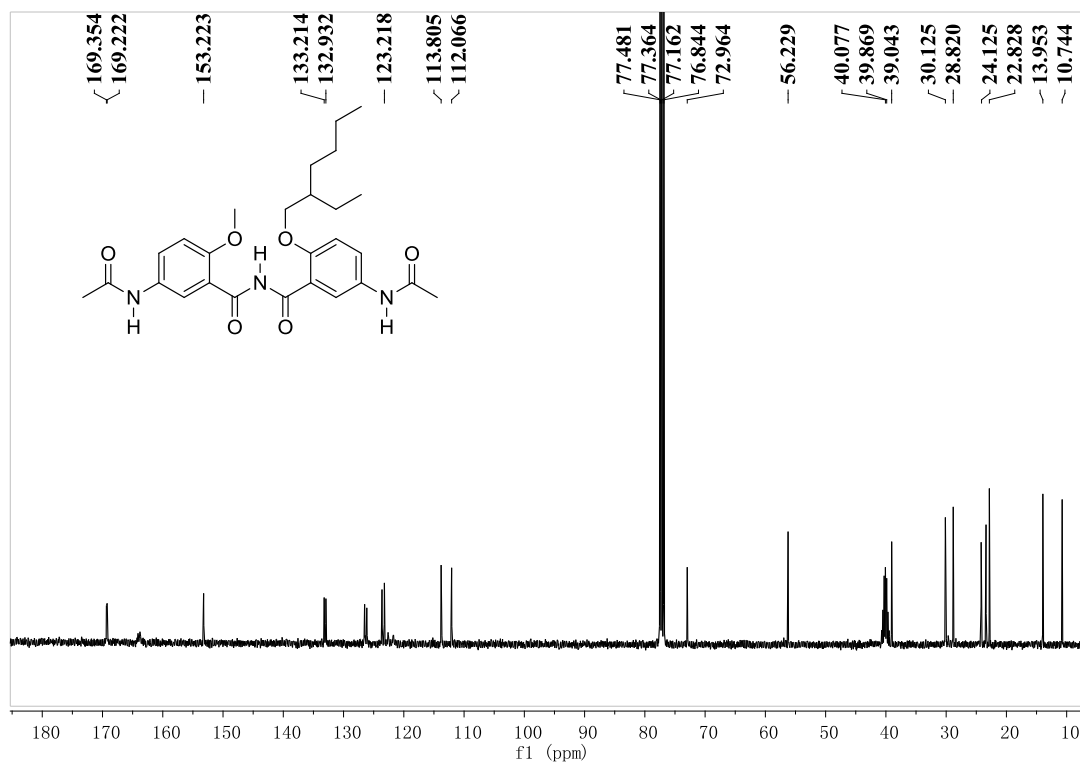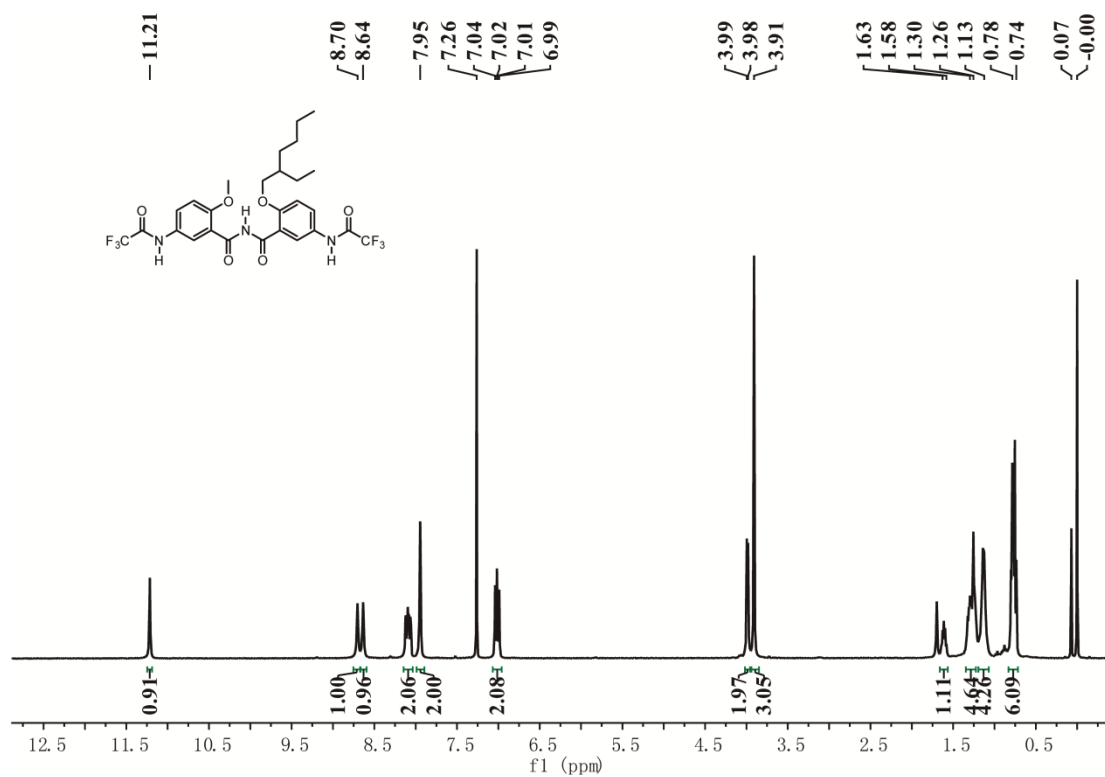

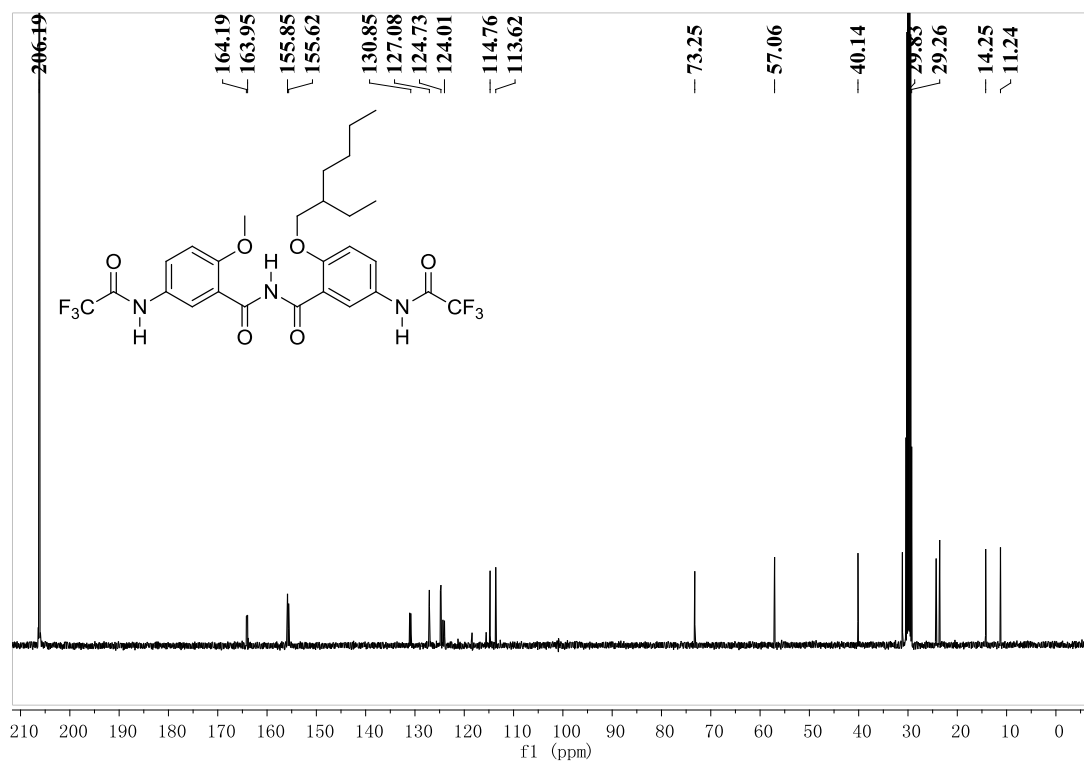

Figure S23.  $^{13}\text{C}$  NMR spectrum (100 MHz, acetone- $d_6$ ) of **1b**.

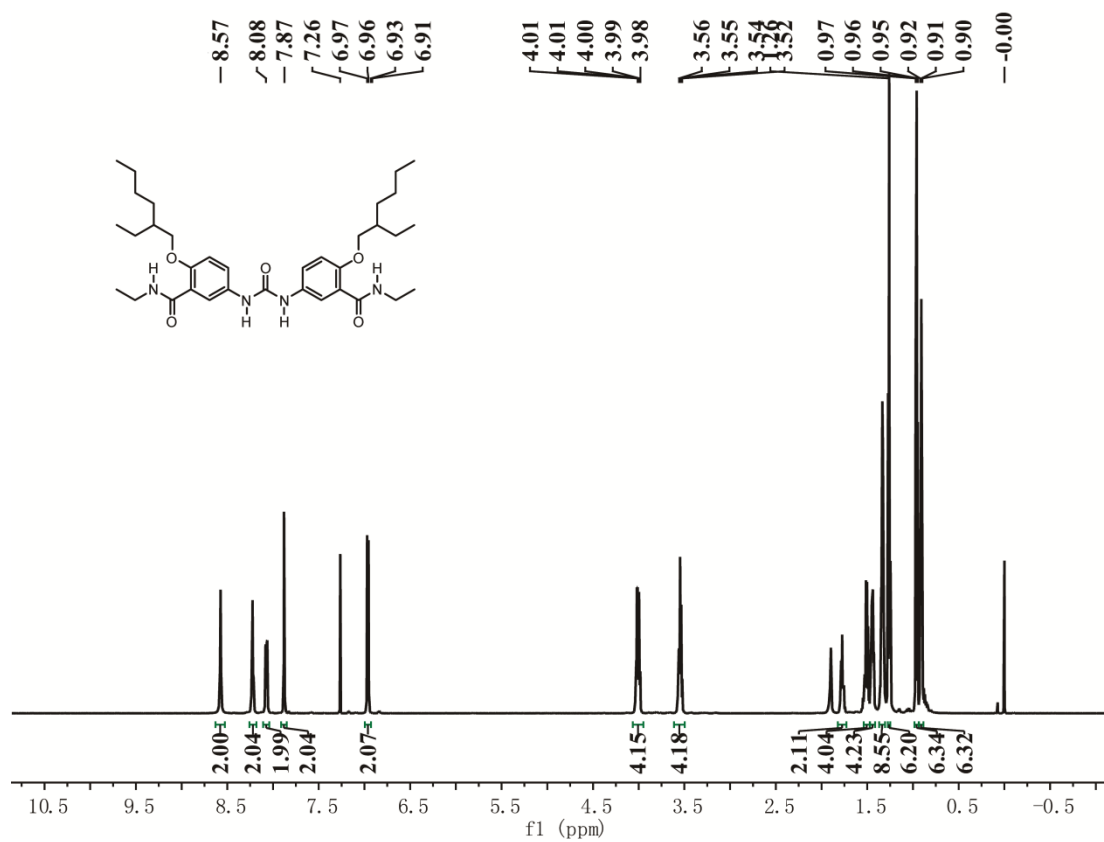

Figure S24.  $^1\text{H}$  NMR spectrum (400 MHz,  $\text{CDCl}_3$ ) of **2a**.

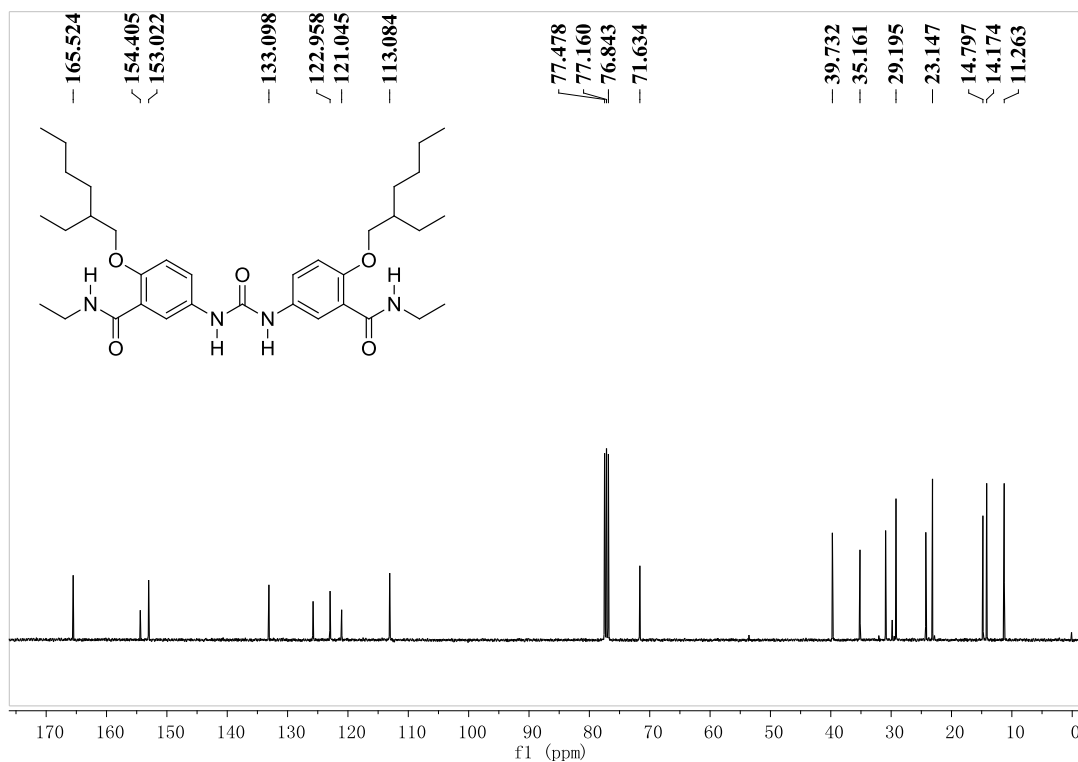

Figure S25. <sup>13</sup>C NMR spectrum (100 MHz, CDCl<sub>3</sub>) of 2a.

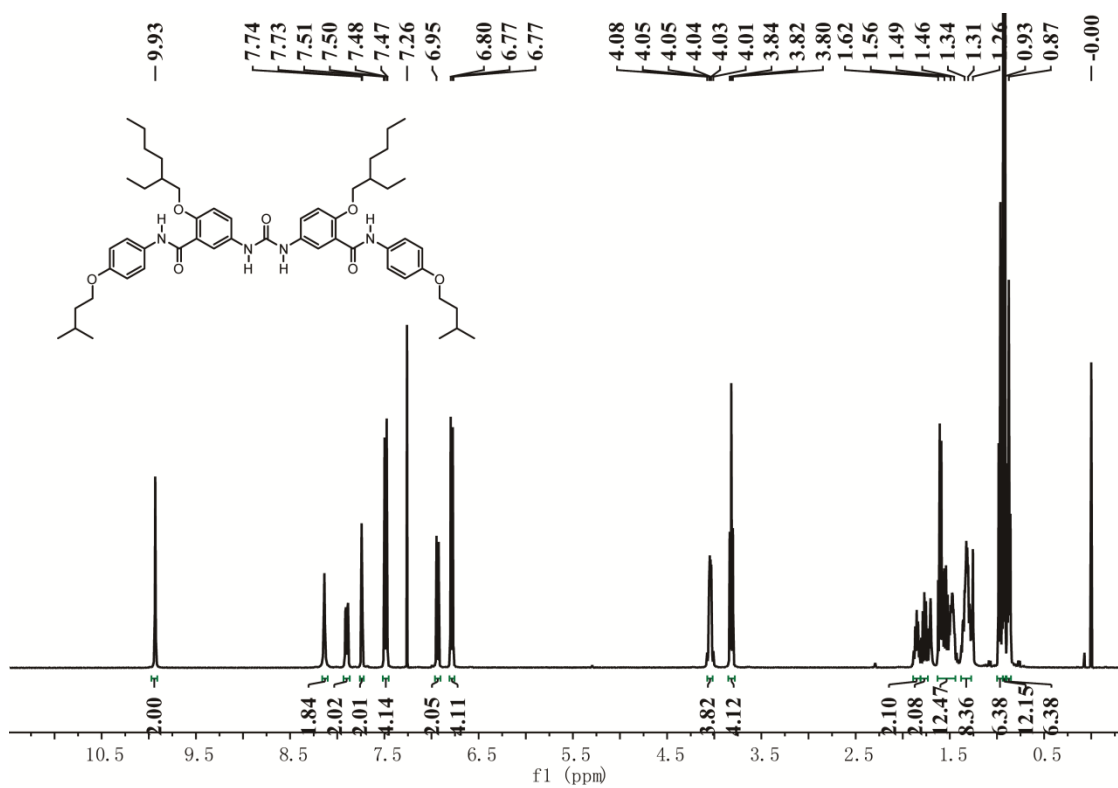

Figure S26. <sup>1</sup>H NMR spectrum (400 MHz, CDCl<sub>3</sub>) of 2b.

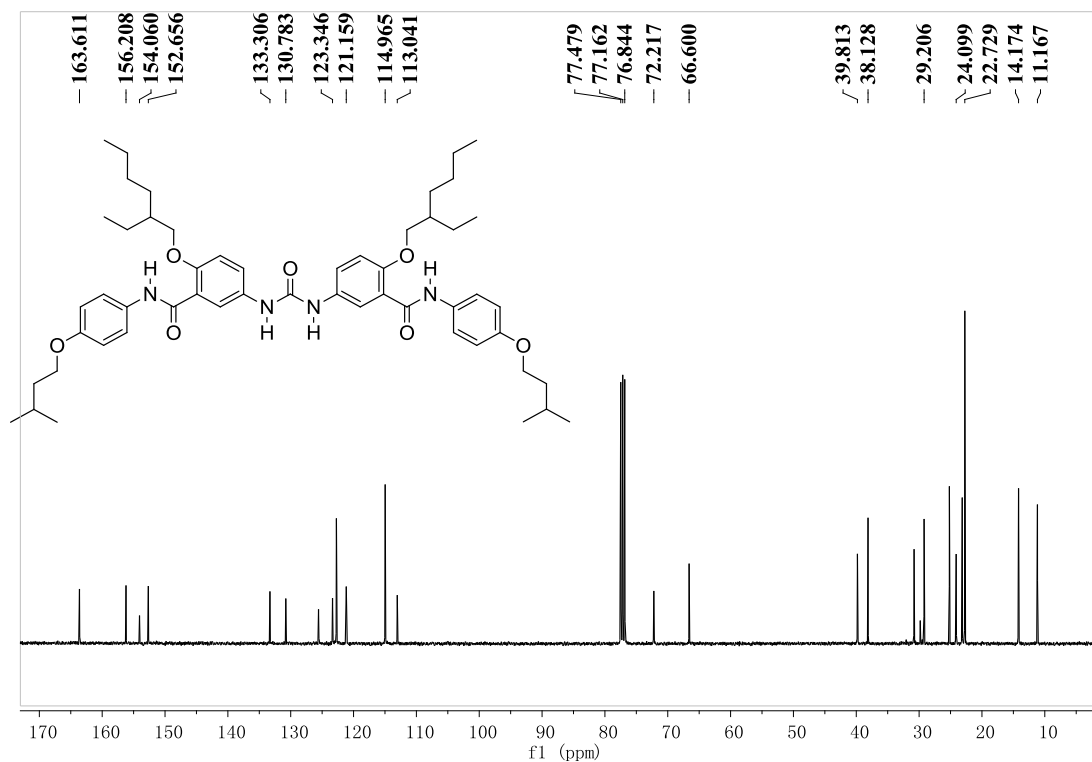

Figure S27. <sup>13</sup>C NMR spectrum (100 MHz, CDCl<sub>3</sub>) of 2b.

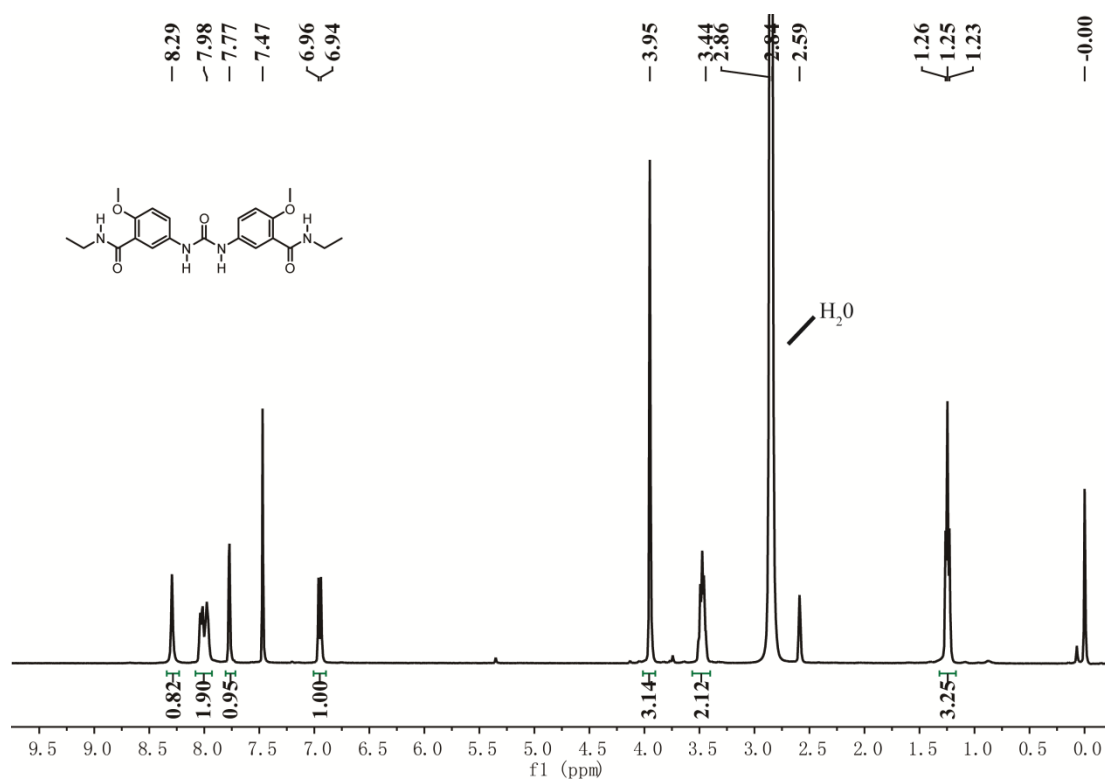

Figure S28. <sup>1</sup>H NMR spectrum (400 MHz, CDCl<sub>3</sub>/DMSO-d<sub>6</sub>) of 2c.

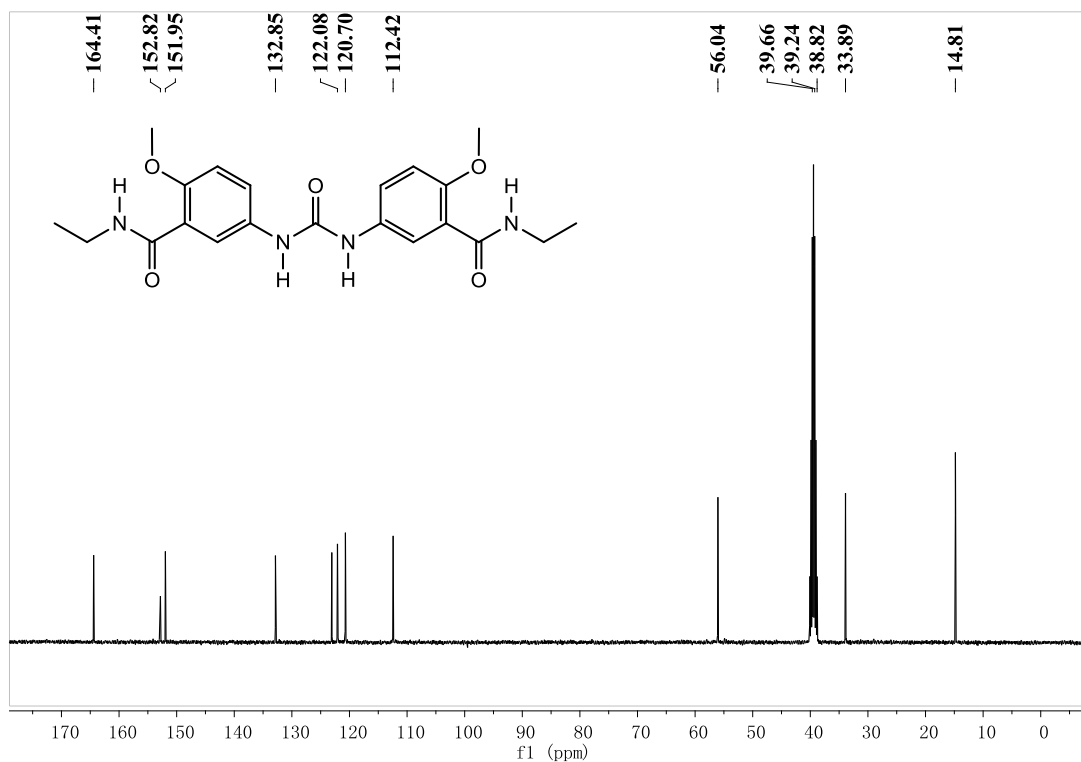

Figure S29. <sup>13</sup>C NMR spectrum (100 MHz, DMSO-d<sub>6</sub>) of 2c.

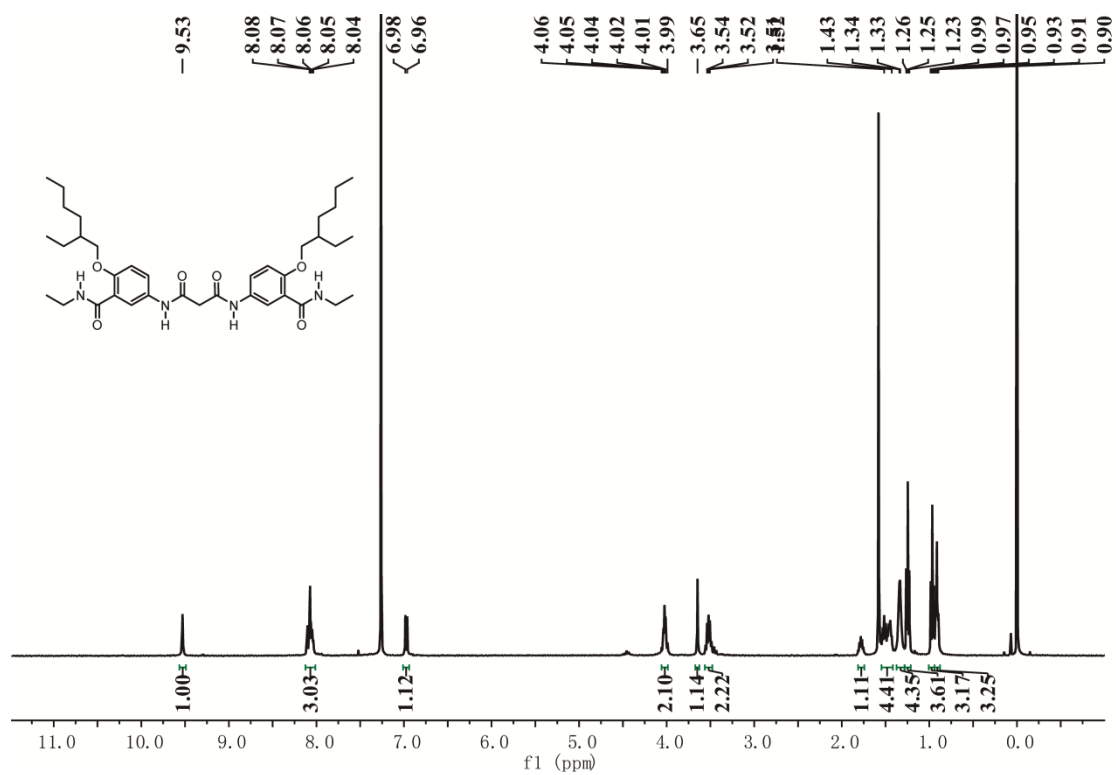

Figure S30. <sup>1</sup>H NMR spectrum (400 MHz, CDCl<sub>3</sub>) of 2d.

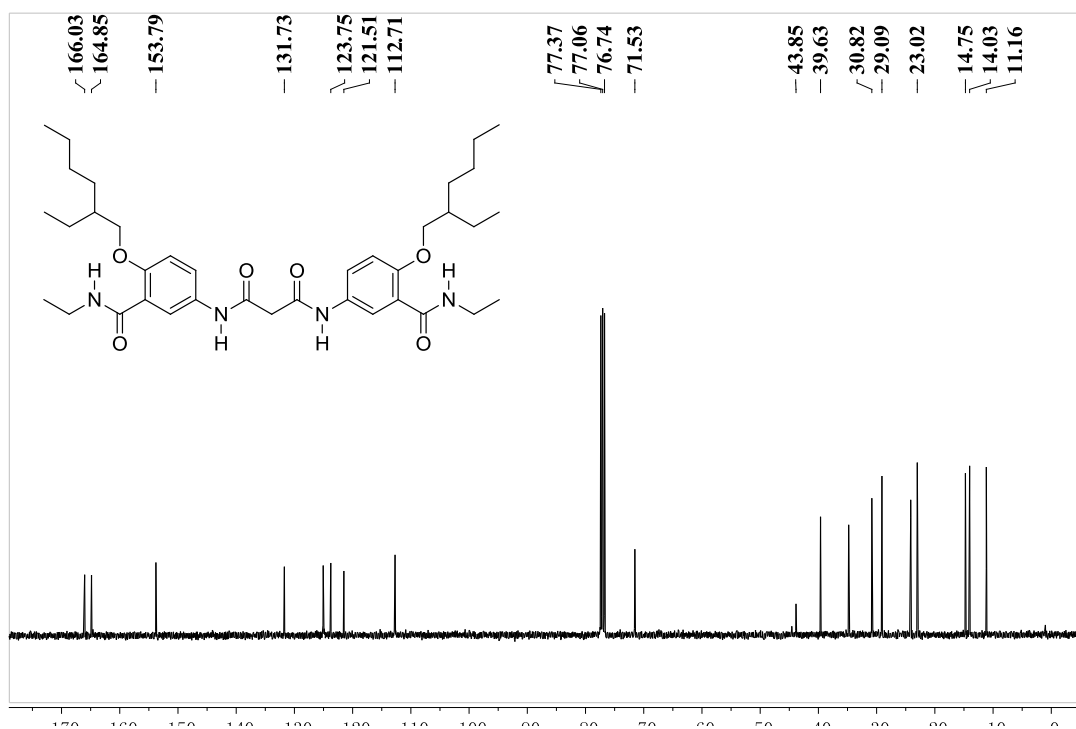

Figure S31.  $^{13}\text{C}$  NMR spectrum (100 MHz,  $\text{CDCl}_3$ ) of **2d**.

## 7. References

- 1 (a) K. A. Connors, *Binding Constants*; Wiley: New York, 1987; (b) P. Thordarson “Binding Constants and Their Measurement” in *Supramolecular Chemistry: From Molecules to Nanomaterials*, DOI: 10.1002/9780470661345. smc018, Wiley, 2012. (c) A. P. Bisson, F. J. Carver, D. S. Eggleston, R. C. Haltiwanger, C. A. Hunter, D. L. Livingstone, J. F. McCabe, C. Rotger and A. E. Rowan, *J. Am. Chem. Soc.*, 2000, **122**, 8856.
- 2 M. J. Frisch, G. W. Trucks, H. B. Schlegel, G. E. Scuseria, M. A. Robb, J. R. Cheeseman, V. G. Zakrzewski, J. A. Montgomery, Jr., R. E. Stratmann, J. C. Burant, S. Dapprich, J. M. Millam, A. D. Daniels, K. N. Kudin, M. C. Strain, O. Farkas, J. Tomasi, V. Barone, M. Cossi, R. Cammi, B. Mennucci, C. Pomelli, C. Adamo, S. Clifford, J. Ochterski, G. A. Petersson, P. Y. Ayala, Q. Cui, K. Morokuma, N. Rega,; P. Salvador, J. J. Dannenberg, D. K. Malick, A. D. Rabuck, K. Raghavachari, J. B. Foresman, J. Cioslowski,; J. V. Ortiz, A. G. Baboul, B. B.

Stefanov, G. Liu, A. Liashenko, P. Piskorz, I. Komaromi, R. Gomperts, R. Martin, L. D. J. Fox, T. Keith, M. A. Al-Laham, C. Y. Peng, A. Nanayakkara, M. Challacombe, P. M. W. Gill, B. Johnson, W. Chen,; M. W. Wong, J. L. Andres, C. Gonzalez, M. Head-Gordon, E. S. Replogle and J. A. Pople, Gaussian 03, Revision D.01, Gaussian, Inc., Wallingford, CT, 2004.
